**Title:** Aiolos modulates the T<sub>FH</sub> and CD4-CTL differentiation programs via reciprocal regulation of the Zfp831/TCF-1/Bcl-6 axis and CD25

**Authors:** Kaitlin A. Read<sup>1,2,‡</sup>, Devin M. Jones<sup>1,2,‡</sup>, Srijana Pokhrel<sup>1</sup>, Emily D.S. Hales<sup>1</sup>, Aditi Varkey<sup>1</sup>, Jasmine A. Tuazon<sup>1,2,3</sup>, Caprice D. Eisele<sup>1,2,4</sup>, Omar Abdouni<sup>1</sup>, Abbey Saadey<sup>1,2</sup>, Robert T. Warren<sup>1</sup>, Michael D. Powell<sup>5</sup>, Jeremy M. Boss<sup>5</sup>, Emily A. Hemann<sup>1,6</sup>, Jacob S. Yount<sup>1,6</sup>, Hazem E. Ghoneim<sup>1,7</sup>, Chan-Wang J. Lio<sup>1,7</sup>, Aharon G. Freud<sup>4,7</sup>, Patrick L. Collins<sup>1,7</sup>, & Kenneth J. Oestreich<sup>1,6,7\*</sup>

**Affiliations:**

<sup>1</sup> Department of Microbial Infection and Immunity; The Ohio State University College of Medicine and Wexner Medical Center, Columbus, Ohio, 43210; USA.

<sup>2</sup> Biomedical Sciences Graduate Program, Columbus, OH, 43210; USA.

<sup>3</sup> Medical Scientist Training Program, Columbus, OH, 43210; USA.

<sup>4</sup> Department of Pathology; The Ohio State University College of Medicine and Wexner Medical Center, Columbus, Ohio, 43210; USA.

<sup>5</sup> Department of Microbiology and Immunology; Emory University School of Medicine, Atlanta, GA, 30322; USA.

<sup>6</sup> Infectious Diseases Institute; The Ohio State University College of Medicine and Wexner Medical Center, Columbus, Ohio, 43210; USA.

<sup>7</sup> Pelotonia Institute for Immuno-Oncology; The Ohio State Comprehensive Cancer Center, Columbus, Ohio, 43210; USA.

‡ These authors contributed equally to this work and the order of the authors should be considered arbitrary.

\* Correspondence should be addressed to K.J.O at [Ken.Oestreich@osumc.edu](mailto:Ken.Oestreich@osumc.edu).

## Abstract

Effective immunity to influenza virus and other respiratory viruses requires the generation of CD4<sup>+</sup> T cell subsets that coordinate multiple aspects of the immune response. These subsets include T follicular helper (T<sub>FH</sub>) and T helper 1 (T<sub>H</sub>1) cells, which promote humoral and cell-mediated responses, respectively. A third population, CD4<sup>+</sup> cytotoxic T lymphocytes (CD4-CTLs) facilitates clearance of infection via mechanisms normally associated with CD8<sup>+</sup> T cells. Here, we identify the transcription factor Aiolos as a regulator of T<sub>FH</sub> and CD4-CTL responses. We demonstrate that Aiolos deficiency compromises T<sub>FH</sub> differentiation and antibody production during influenza virus infection. Conversely, we find that CD4<sup>+</sup> T cells acquire a cytotoxic-like program in the absence of Aiolos, including increased expression of the CTL-associated transcription factors Eomes and Blimp-1. We further show that while Aiolos positively regulates the T<sub>FH</sub> transcriptional regulators Zfp831, TCF-1 and Bcl-6, it also directly represses expression of IL-2R $\alpha$  and IL-2/STAT5-driven expression of the cytotoxic gene program. Thus, our findings identify Aiolos as a pivotal regulator of T<sub>FH</sub> and CD4-CTL differentiation and highlight its potential as a target for manipulating CD4<sup>+</sup> T cell humoral and cytotoxic responses.

## Introduction

Immune responses mounted against intracellular pathogens, such as influenza virus, require coordination between numerous immune cell types. These include the effector CD4<sup>+</sup> T helper 1 (T<sub>H</sub>1), T follicular helper (T<sub>FH</sub>), and cytotoxic subsets, each of which perform distinct activities to clear infection. During infection, T<sub>H</sub>1 cells produce effector cytokines such as interferon gamma (IFN- $\gamma$ ) to both recruit and activate additional immune cell populations to sites of infection<sup>1</sup>. T<sub>FH</sub> populations are key participants in the generation of humoral immune responses through their cognate B cell interactions, which support somatic hypermutation, class-switch recombination, affinity maturation, and the formation of long-lived plasma cell populations<sup>2</sup>. While CD4<sup>+</sup> T cells have classically been appreciated as orchestrators of immune responses, it is now widely accepted that CD4<sup>+</sup> T cells are also capable of differentiating into cytotoxic 'CD4-CTLs'. CD4-CTLs are characterized by their ability to secrete both cytotoxic molecules and pro-inflammatory cytokines, ultimately resulting in the direct targeting and killing of virus-infected cells in a class two major histocompatibility complex (MHC-II) restricted fashion<sup>3,4</sup>. Together, the T<sub>H</sub>1, T<sub>FH</sub>, and CD4-CTL subsets provide the CD4<sup>+</sup> T cell responses important for the clearance of infection. Their dysregulation has also been associated with autoimmune disorders in which inappropriate production of pro-inflammatory molecules and/or the production of autoantibodies drive pathogenesis<sup>4-6</sup>. Thus, due to their central roles in healthy and dysregulated immune responses, understanding the mechanisms that govern the differentiation and function of T<sub>H</sub>1, T<sub>FH</sub>, and CD4-CTL populations is of critical importance.

CD4<sup>+</sup> T cell differentiation is initiated by antigen-presenting cells, which provide antigen-induced signals to the T cell receptor, as well as co-stimulation. Distinct polarization programs are then specified by cytokine signals, which induce the activity of a cascade of downstream transcriptional networks that ultimately imprint the unique transcriptional programs underlying each cell subset<sup>7</sup>. For example, IL-12/STAT4 signaling promotes the expression and function of the T-box factor T-bet, the T<sub>H</sub>1 lineage-defining transcription factor<sup>8,9</sup>. T-bet directly induces

expression of IFN- $\gamma$ , which positively regulates T-bet transcription in a feed-forward loop<sup>10</sup>. T<sub>H</sub>1 differentiation also requires the transcription factor Blimp-1, which represses expression of alternative polarization programs including those underlying the T<sub>FH</sub> subset<sup>11,12</sup>. It is known that the T<sub>H</sub>1 and CD4-CTL gene programs share some regulatory features, including dependence on Blimp-1<sup>4,13</sup>. Furthermore, similar to T-bet in T<sub>H</sub>1 cells, CD4-CTL genes are positively regulated by the related T-box factor Eomesodermin (Eomes). However, to date, much of the transcriptional network underlying CD4-CTL populations remains undefined<sup>4</sup>.

Unlike T<sub>H</sub>1 and CD4-CTL populations, T<sub>FH</sub> cell differentiation requires signaling from STAT3 activating-cytokines, such as IL-6, which induce the expression and function of the transcriptional repressor B cell lymphoma 6 (Bcl-6)<sup>14</sup>. Bcl-6 supports T<sub>FH</sub> differentiation most notably by inhibiting the expression of the T<sub>FH</sub> antagonist Blimp-1, as well as genes associated with alternative cell fates, including those important for T<sub>H</sub>1, CD4-CTL, T<sub>H</sub>2, and T<sub>H</sub>17 differentiation<sup>11,15-17</sup>. While Bcl-6 is considered the lineage-defining transcription factor for T<sub>FH</sub> development, T<sub>FH</sub> differentiation also relies upon TCF-1 (encoded by the gene *Tcf7*), Lef-1, Zfp831, Tox, Tox2, Maf, Batf, Ascl2, and Irf4<sup>5,18</sup>. Of these, Tox2, Batf, TCF-1, and Zfp831 have been implicated in the direct induction of *Bcl6* expression<sup>19-24</sup>. Like Bcl-6, TCF-1 also represses the expression of Blimp-1, and has been implicated in the negative regulation of both T<sub>H</sub>1 and CD4-CTL differentiation<sup>15,19,23,25</sup>. While much remains to be explored regarding the transcription factor Zfp831, it was recently identified as an upstream, positive regulator of both *Tcf7* and *Bcl6*<sup>21</sup>. Together, these early factors both set the stage for T<sub>FH</sub> differentiation, and function to oppose alternative gene programs.

IL-2 signaling, which is propagated through tyrosine phosphorylation-dependent activation of STAT5, is also a key determinant in the regulation of T<sub>H</sub>1, T<sub>FH</sub>, and CD4-CTL populations. IL-2/STAT5 signaling supports T<sub>H</sub>1 and CD4-CTL generation, while opposing T<sub>FH</sub> differentiation<sup>3,4,12,26-29</sup>. In T<sub>H</sub>1 and CD4-CTL populations, STAT5 directly induces expression of Blimp-1, and competes with the pro-T<sub>FH</sub> transcription factor STAT3 to directly repress

expression of *Bcl6* and additional T<sub>FH</sub> gene targets<sup>12</sup>. During T<sub>FH</sub> differentiation, IL-6 and IL-21-driven STAT3 represses IL-2 receptor expression and induces the expression of T<sub>FH</sub> genes including *Bcl-6*<sup>30</sup>. Collectively, the available literature suggests that opposing sets of environmental and transcriptional regulators function to maintain the appropriate balance of T<sub>H</sub>1, T<sub>FH</sub>, and CD4-CTL effector responses during infection. Given the importance of this balance in maintaining health versus disease, the identity of factors that comprise these networks, as well as the unifying regulators that govern these relationships warrant further investigation.

Here, we have identified the Ikaros zinc finger transcription factor Aiolos as a central regulator of CD4<sup>+</sup> T cell differentiation and effector responses to infection. We find that Aiolos deficiency cripples both T<sub>FH</sub> cell differentiation and antibody production during influenza virus infection. We further find that loss of Aiolos allows for acquisition of a cytotoxic program that includes increased expression of key CTL transcriptional regulators and effector molecules. Mechanistically, we demonstrate that Aiolos positively regulates the expression of key T<sub>FH</sub> transcription factors, while repressing IL-2R $\alpha$  (CD25), through association with their respective gene regulatory elements. Consequently, Aiolos suppresses IL-2/STAT5-driven expression of the cytotoxic gene program. Together, these findings identify Aiolos as a reciprocal regulator of T<sub>FH</sub> and CD4-CTL differentiation and support its potential as a target for the therapeutic manipulation of CD4<sup>+</sup> T cell-dependent humoral and cytotoxic responses.

## Results

### Aiolos-deficient mice display defects in T<sub>FH</sub> differentiation

In a prior study, we demonstrated that Aiolos cooperates with STAT3 to directly induce *Bcl-6* expression in CD4<sup>+</sup> T cells<sup>31</sup>. Given that *Bcl-6* is the lineage-defining transcription factor for T<sub>FH</sub> cells, we hypothesized that Aiolos is required for T<sub>FH</sub> cell differentiation. To explore this possibility *in vivo*, we employed a well-established murine model of influenza virus infection. We

began by infecting wildtype (WT) C57BL/6J mice with influenza A/PR/8/34 (H1N1), commonly termed PR8. We first evaluated Aiolos expression in naive CD4<sup>+</sup> T cells, PD-1<sup>+</sup>Cxcr5<sup>+</sup> T<sub>FH</sub> cells, and non-T<sub>FH</sub> populations in lung-draining lymph nodes (DLN) (**Fig. 1A** and **Extended Data Fig. 1A**). Consistent with a role for Aiolos in T<sub>FH</sub> populations generated *in vivo*, Aiolos protein expression was significantly elevated in T<sub>FH</sub> populations relative to naive and non-T<sub>FH</sub> cells. Further, we found that Aiolos was highest in germinal center (GC) T<sub>FH</sub> cells, characterized by high expression of PD-1 and Cxcr5 (**Fig. 1A**). To determine whether Aiolos is similarly increased in human T<sub>FH</sub> cell populations, we analyzed previously published RNA-seq data for human naive, non-T<sub>FH</sub>, and T<sub>FH</sub> cell populations from human tonsils (GSE58597)<sup>32</sup>. Indeed, human Aiolos (*IKZF3*) expression was highest in T<sub>FH</sub> populations, and its expression correlated with that of key T<sub>FH</sub> transcriptional regulators (*BCL6*, *TOX*, *TOX2*) and cell surface receptors (*CD40LG*, *PDCD1*, and *IL6R*) (**Extended Data Fig. 1B,C**). Expression of genes associated with antagonism of T<sub>FH</sub> differentiation, including *PRDM1* (which encodes BLIMP-1) and *IL2RA*, inversely correlated with Aiolos expression. We next examined Aiolos protein expression in T<sub>FH</sub> and non-T<sub>FH</sub> effector cells isolated from human tonsils. Again, Aiolos expression was elevated in T<sub>FH</sub> populations relative to non-T<sub>FH</sub> effector cells (**Extended Data Fig. 1D,E**). Together, these findings supported a conserved role for Aiolos as a potential positive regulator of T<sub>FH</sub> differentiation in both mice and humans.

To determine whether Aiolos influences the generation of T<sub>FH</sub> populations *in vivo*, we infected Aiolos-deficient (*Ikzf3*<sup>-/-</sup>) or WT mice with PR8 and assessed T<sub>FH</sub> populations residing in the DLN via flow cytometry. Consistent with our hypothesis, *Ikzf3*<sup>-/-</sup> mice exhibited a significant decrease in the percentage of T<sub>FH</sub> cells (identified as PD-1<sup>+</sup>Cxcr5<sup>+</sup> or Bcl-6<sup>+</sup>Cxcr5<sup>+</sup>) relative to WT controls (**Fig. 1B** and **Extended Data Fig. 2A-C**). To determine whether the reduction of T<sub>FH</sub> populations was maintained in antigen-specific populations, we stained with influenza nucleoprotein (NP<sub>311</sub>)-specific fluorochrome-labeled tetramers. As in bulk populations, loss of Aiolos resulted in a significant decrease in the percentage of NP-specific T<sub>FH</sub> cells (**Fig. 1C,D**). This reduction was

not due to an overall difference in NP-specific cells in the absence of Aiolos, as these numbers were roughly equivalent between genotypes (**Extended Data Fig. 2D**). To determine whether the decrease in T<sub>FH</sub> cell populations resulted in a functional impact on humoral responses, we measured influenza-specific antibody production via serum ELISA. We observed a significant reduction in flu-specific serum IgM and IgG in Aiolos-deficient animals relative to WT controls (**Fig. 1E**). Together, these findings are suggestive of a requirement for Aiolos in both the generation of antigen-specific T<sub>FH</sub> cell populations and flu-specific antibody production during influenza virus infection.

### **The T<sub>FH</sub> transcriptional program is disrupted in the absence of Aiolos**

We next evaluated Aiolos expression across *in vitro*-generated T helper cell subsets, including T<sub>H1</sub>, T<sub>H2</sub>, and T<sub>FH</sub>-like cells cultured in the presence of the murine T<sub>FH</sub>-inducing cytokine, IL-6<sup>30,33,34</sup>. Aiolos expression was significantly elevated in T<sub>FH</sub>-like cells compared to other cell types analyzed, and correlated with expression of Bcl-6 transcript and protein (**Fig. 2A** and **Extended Data Fig. 2B**). This was consistent with our previous findings<sup>31</sup> and provided a robust *in vitro* system with which to determine mechanisms by which Aiolos supports the generation of T<sub>FH</sub> cell populations. To examine alterations in the T<sub>FH</sub> transcriptome in the absence of Aiolos, we cultured naive WT or Aiolos-deficient CD4<sup>+</sup> T cells under T<sub>FH</sub>-polarizing conditions and performed RNA-seq analysis. Hierarchical clustering analysis revealed that Aiolos-deficient cells exhibited a distinct gene expression profile (**Extended Data Fig. 3A**). Genes downregulated in the absence of Aiolos included those encoding key pro-T<sub>FH</sub> transcriptional regulators (*Bcl6*, *Tox*, *Tox2*, *Tcf7*, and *Zfp831*), as well as a number of other T<sub>FH</sub>- associated genes. Conversely, expression of the T<sub>FH</sub> antagonist Blimp-1 was markedly increased in the absence of Aiolos (**Fig. 2B,C**). We further found that expression of genes encoding the IL-2 receptor subunits IL-2R $\alpha$  (CD25) and IL-2R $\beta$  (CD122) were elevated in Aiolos-deficient cells,

while *Irf6* (encoding the IL-6R subunit gp130) was decreased (**Fig. 2B,D**). This was notable because IL-2/STAT5 signaling is a well-established repressor of T<sub>FH</sub> differentiation and is known to induce expression of Blimp-1<sup>11,12,26,29,35,36</sup>. Consistent with these findings, gene set enrichment analysis (GSEA) of hallmark and immunologic signature gene sets revealed that genes upregulated in T<sub>FH</sub> populations (versus T<sub>H</sub>1) were among the most downregulated in the absence of Aiolos, while those associated with the IL-2/STAT5 pathway were elevated (**Fig. 2E,F**).

Curiously, in contrast to the T<sub>FH</sub> gene signature, we observed marked increases in expression of genes associated with T<sub>H</sub>1 and CD4-CTL differentiation and effector responses in the absence of Aiolos (**Fig. 2B,C**). These findings were supported by GSEA analysis indicating an increase in the expression of gene sets associated with both interferon gamma signaling and cytotoxic programming (**Fig. 2G,H**). Collectively, these findings suggested that Aiolos may not only promote T<sub>FH</sub> differentiation through activation of key transcriptional regulators, but it may also safeguard the T<sub>FH</sub> gene program by repressing genes associated with alternative (T<sub>H</sub>1, CD4-CTL) cell states.

### **Aiolos associates with and alters chromatin structure at T<sub>FH</sub> gene regulatory elements**

RNA-seq and confirmatory qRT-PCR analyses revealed reduced expression of several key T<sub>FH</sub> transcriptional regulators in Aiolos-deficient cells cultured under T<sub>FH</sub>-like polarizing conditions (**Fig. 2C** and **3A-C**). To determine whether Aiolos directly regulated these gene targets, we utilized a combined Assay for Transposase-Accessible Chromatin (ATAC)-seq and chromatin immunoprecipitation (ChIP) approach. We began by leveraging ATAC-seq analysis of *in vitro* polarized WT and *Ikzf3*<sup>-/-</sup> CD4<sup>+</sup> T cells to identify differing regions of chromatin accessibility (**Fig. 3D-F**). We found several regions in which chromatin accessibility was negatively impacted by the absence of Aiolos, including those at the *Bcl6* promoter, *Tcf7* 5'UTR, and a region upstream



of the *Zfp831* TSS. Bcl-6 and TCF-1 (Tcf7) are well-established positive regulators of T<sub>FH</sub> cell differentiation, while *Zfp831* was recently identified as a direct inducer of both of these factors<sup>11,16,17,19,21-23</sup>. To determine whether Aiolos may directly regulate these genes in *in vitro*-generated T<sub>FH</sub>-like cells, we performed ChIP analyses at identified differentially accessible regions and control regions which did not display altered chromatin accessibility. Consistent with our hypothesis, Aiolos enrichment was elevated at *Bcl6*, *Tcf7*, and *Zfp831* regulatory regions relative to that of an irrelevant antibody control and that observed at control genomic regions (**Fig. 3G-I**).

Our RNA-seq and qRT-PCR analyses further revealed that T<sub>FH</sub>-skewed Aiolos-deficient cells express significantly altered cytokine receptor repertoires, including increased expression of *Il2ra* (**Figs. 2D** and **3J**). Strikingly, ATAC-seq analysis revealed increased chromatin accessibility at the *Il2ra* promoter in *Ikzf3*<sup>-/-</sup> compared to WT cells, while accessibility was decreased at T<sub>FH</sub> transcription factor loci (**Fig. 3D-F,K**). As Aiolos has also been implicated in the repression of target genes, we hypothesized that Aiolos may also function to repress *Il2ra* expression. Indeed, ChIP analysis revealed that Aiolos was enriched at the *Il2ra* promoter relative to an upstream control region (**Fig. 3L**). Given that Blimp-1 (*Prdm1*) expression was also increased in the absence of Aiolos, we considered the possibility that Aiolos may directly regulate its expression. While a known *Prdm1* intronic enhancer element exhibited increased accessibility in the absence of Aiolos, we did not observe Aiolos enrichment at this region (**Extended Data Fig. 4A,B**). This suggests that Aiolos may repress Blimp-1 expression via an indirect mechanism or possibly through interaction with another regulatory region (**Extended Data Fig. 4C**). Taken together, these data are suggestive of a mechanism whereby Aiolos directly regulates key T<sub>FH</sub> transcription factors and CD25 expression in a reciprocal fashion to promote T<sub>FH</sub> differentiation.

## **Aiolos deficient cells express hallmark CD4-CTL transcription factors and molecules**

RNA-seq analyses of Aiolos-deficient cells cultured under T<sub>FH</sub>-like polarizing conditions revealed not only compromised T<sub>FH</sub> cell programming, but also augmented expression of transcription factors and effector features associated with T<sub>H</sub>1 and CD4-CTLs (**Fig. 2B,C**). These data are consistent with other studies demonstrating that regulators of T<sub>FH</sub> differentiation oppose both T<sub>H</sub>1 and CD4-CTL differentiation<sup>15,17</sup>. We first sought to examine the role of Aiolos in regulating T<sub>H</sub>1 differentiation by culturing naive WT and Aiolos-deficient CD4<sup>+</sup> cells under T<sub>H</sub>1 cell polarizing conditions. We assessed expression of *Bcl6* and the T<sub>H</sub>1 lineage-defining transcription factor T-bet (encoded by *Tbx21*) at the transcript and protein level. Although we observed diminished expression of *Bcl6* in the absence of Aiolos, *Tbx21* transcript and protein remained unchanged, suggesting that loss of Aiolos may not augment T<sub>H</sub>1 differentiation in this context (**Fig. 4A,B**). Strikingly, however, expression of the related T-box factor, Eomesodermin (Eomes), which has a stronger association with the cytotoxic programs of CD4<sup>+</sup> and CD8<sup>+</sup> T cells, was significantly increased (**Fig. 4A,B**)<sup>4,7,37,38</sup>.

Relative to T<sub>H</sub>1 populations, CD4-CTLs display increased production of IFN- $\gamma$ , as well as the expression of cytolytic molecules including granzymes and perforin<sup>4</sup>. Consistent with increased Eomes expression, we found that *Ikzf3*<sup>-/-</sup> cells polarized under T<sub>H</sub>1 conditions expressed more IFN- $\gamma$ , granzyme B, and perforin at both the transcript and protein levels (**Figs. 4C-H**). To better understand transcriptomic changes, we performed RNA-seq analysis of WT and Aiolos-deficient cells cultured under T<sub>H</sub>1 conditions. In agreement with the prior data, this analysis revealed increased expression of additional transcription factors (*Prdm1*, *Runx3*) and cell surface receptors associated with the cytotoxic programs of CD4<sup>+</sup> T cells (**Fig. 5A-C**). In contrast, transcription factors associated with T<sub>FH</sub> differentiation and antagonists of CTL-differentiation were downregulated in the absence of Aiolos (**Fig. 5C**). Further, gene set enrichment analysis revealed that gene signatures associated with cytotoxicity and IL-2/STAT5 signaling were

among the most upregulated signatures in the absence of Aiolos (**Fig. 5D,E**). Collectively, these data indicate that Aiolos deficiency results in an increase in hallmark features of cytotoxicity and supports a role for Aiolos as a repressor of the cytotoxic gene program in CD4<sup>+</sup> T cells.

### **Aiolos deficiency results in acquisition of cytotoxic features by CD4 T cells *in vivo***

Our prior *in vivo* data revealed a reduction in the percentage of T<sub>FH</sub> cells in the DLN of Aiolos-deficient mice, while our *in vitro* studies demonstrated an increase in cytotoxic programming in the *Ikzf3*<sup>-/-</sup> cells cultured under T<sub>H1</sub> or T<sub>FH</sub>-like conditions. To further determine the impact of Aiolos-deficiency *in vivo*, we next infected WT and Aiolos-deficient (*Ikzf3*<sup>-/-</sup>) mice with PR8 and assessed T-bet and Eomes expression in NP-specific CD4<sup>+</sup> T cells of the DLN via flow cytometry. Consistent with our *in vitro* findings, there was no difference in the percentage of T-bet positive NP-specific cells from the DLN of WT and *Ikzf3*<sup>-/-</sup> mice (**Figs. 6A,B**). However, the percentage of Eomes positive NP-specific cells was enhanced in the DLN of Aiolos-deficient mice compared to that of WT (**Figs. 6A,B**). We next examined perforin expression, an Eomes target gene and CTL effector molecule, and found elevated percentages of perforin producing Eomes<sup>+</sup>T-bet<sup>+</sup> and Eomes<sup>+</sup>T-bet<sup>-</sup> cells in Aiolos-deficient mice compared to WT (**Fig. 6C,D**). In contrast, we did not observe a difference in Eomes<sup>-</sup>T-bet<sup>+</sup> perforin expressing cells, demonstrating a correlation between Aiolos-deficiency and Eomes and perforin expression (**Fig. 6D**). Similarly, analysis of NP-specific populations revealed increased percentages of Eomes<sup>+</sup> perforin expressing cells in *Ikzf3*<sup>-/-</sup> mice compared to WT (**Fig. 6E**). We also examined expression of the CTL marker Cx3cr1 and found increased percentages of NP-specific Cx3cr1<sup>+</sup> cells in Aiolos-deficient mice relative to WT (**Fig. 6F** and **Extended Data Fig. 5**). Collectively, these *in vitro* and *in vivo* findings indicate that Aiolos restrains expression of a cytotoxic-like program, at least in part, via repressive effects on the T-box transcription factor Eomes.

### Loss of Aiolos results in elevated CD25 expression

IL-2/STAT5 signaling is known to both repress T<sub>FH</sub> and promote CD4-CTL differentiation. Since our RNA-seq analysis indicated that IL-2 receptor subunit transcript was elevated in the absence of Aiolos, we next examined whether Aiolos may both support T<sub>FH</sub> generation and repress CD4-CTL differentiation by repressing aspects of IL-2/STAT5 signaling *in vivo*. We infected Aiolos-deficient mice with PR8 and assessed alterations in the surface expression of CD25 on CD4<sup>+</sup> effector T cells (CD44<sup>+</sup>CD62L<sup>-</sup>Foxp3<sup>-</sup>) of the DLN. Indeed, analysis of bulk CD4<sup>+</sup> effector populations revealed a significant increase in both the percentage of CD25<sup>+</sup> cells and the level of CD25 expression in the absence of Aiolos (**Fig. 7A**). Analysis of antigen-specific effector cells from the DLN revealed a similar upregulation of CD25 on *Ikzf3*<sup>-/-</sup> versus WT cells (**Fig. 7B**). We considered the possibility that the increase in CD25 surface expression may be due to an overall increase in IL-2 production in the absence of Aiolos, as Aiolos was previously shown to repress IL-2 production in *in vitro*-generated T<sub>H</sub>17 cells<sup>39</sup>. However, analysis of IL-2 production *in vivo* revealed no significant difference between WT and Aiolos-deficient CD4<sup>+</sup> T cell populations (**Fig. 7C**). These data, together with our identification of *Ii2ra* as a direct Aiolos target, suggest that Aiolos represses IL-2 responsiveness to both promote T<sub>FH</sub> and repress CD4-CTL differentiation.

### Absence of Aiolos results in increased STAT5 enrichment at CTL genes

IL-2/STAT5 signaling is known to positively regulate the cytotoxic gene program in CD4<sup>+</sup> T cells. As such, we considered the possibility that increased CD25 expression in the absence of Aiolos may lead to increased STAT5 activation and STAT5-dependent induction of the CTL gene program. Analysis of tyrosine phosphorylation of STAT5 revealed increased STAT5 activation in Aiolos-deficient compared to WT cells cultured under T<sub>H</sub>1 conditions (**Fig. 8A**). ATAC-seq analysis of the known STAT5 target genes, *Ii2ra* and *Prdm1*, revealed increased chromatin

accessibility at promoter and intronic enhancer elements in the absence of Aiolos, respectively, and these alterations positively correlated with increased gene expression (**Fig. 8B,C** and **Extended Data Fig. 6A,B**). The areas of increased accessibility also corresponded to known sites of STAT5 enrichment, as determined by previously published ChIP-seq data (**Fig. 8B,C**). To determine whether STAT5 enrichment was enhanced at these regions in the absence of Aiolos, we performed ChIP analysis in WT and *Ikzf3*<sup>-/-</sup> cells. Indeed, ChIP revealed enhanced STAT5 association with both regulatory elements in the absence of Aiolos (**Fig. 8D,E**). Similar analyses revealed enhanced chromatin accessibility and STAT5 enrichment at regulatory regions of *Eomes*, *Ifng*, *Gzmb*, and *Prf1* in Aiolos-deficient cells (**Fig. 8F,G** and **Extended Data Fig. 6C**). Collectively, the above findings support a mechanism whereby Aiolos deficiency results in augmented IL-2R $\alpha$  expression, enhanced sensitivity to IL-2, and increased association of STAT5 with CD4-CTL gene targets.

## Discussion

Our present study identifies Aiolos as a reciprocal regulator of the differentiation programs of T<sub>FH</sub> and CD4-CTL cells. Mechanistically, we find that Aiolos associates with and positively regulates chromatin structure at the regulatory elements of genes encoding Bcl-6, TCF-1, and Zfp831, transcription factors required for T<sub>FH</sub> differentiation. We further show that Aiolos represses CD25 expression and thus cell responsiveness to IL-2, a potent T<sub>FH</sub> inhibitory cytokine. Consequently, we find that Aiolos-deficiency results in increased IL-2/STAT5 signaling, repression of T<sub>FH</sub> differentiation, and induction of the cytotoxic gene program. Importantly, a key regulatory aspect of the increased cytotoxic programming of these cells is induction of *Eomes* expression via IL-2/STAT5 signaling, rather than impacts on the related T-box factor, T-bet.

The findings presented here indicate that Aiolos promotes T<sub>FH</sub> differentiation by at least two mechanisms. First, Aiolos directly associates with the regulatory regions of key T<sub>FH</sub>

transcriptional regulators. Since the identification of Bcl-6 as the lineage-defining factor for T<sub>FH</sub> differentiation over a decade ago, there has been steady growth in our understanding of the transcriptional mechanisms that regulate T<sub>FH</sub> differentiation<sup>11,16,17</sup>. This includes the identification of additional transcription factors that operate upstream or in parallel with Bcl-6, such as TCF-1 and Zfp831, to promote expression of the T<sub>FH</sub> gene program<sup>19,21-23</sup>. Our findings demonstrate that Aiolos is enriched at all three genes and that expression of these genes, as well as T<sub>FH</sub> differentiation, is disrupted in its absence. Importantly, we also find that expression of the T<sub>FH</sub> antagonist, Blimp-1, is enhanced in the absence of Aiolos. Taken together, these findings indicate that Aiolos represents a key upstream transcriptional regulator of other transcription factors that both promote and repress T<sub>FH</sub> differentiation.

Second, our transcriptomics data indicate that Aiolos is a reciprocal regulator of subunits of the IL-6R and IL-2R complexes, which allow for the propagation of cytokine signaling pathways that are known to promote and repress T<sub>FH</sub> differentiation, respectively<sup>14</sup>. These data suggest that Aiolos positively impacts T<sub>FH</sub> differentiation by maintaining a pro-T<sub>FH</sub> balance of these cytokine receptors. Further highlighting the relationship between Aiolos and IL-6R signaling are prior findings from our lab that identified a novel transcriptional complex composed of Aiolos and STAT3 which, among other cytokines, is activated in response to IL-6<sup>31</sup>. Thus, our combined findings suggest that Aiolos regulates not only IL-6R expression, but perhaps also the downstream activities of STAT3 in the nucleus. From this standpoint, it is interesting to speculate whether Aiolos/STAT3 complexes may regulate gene expression by antagonizing STAT5 association with target genes. Indeed, prior studies have demonstrated that competitive mechanisms between STAT3 and STAT5 are important in the promotion and inhibition of T<sub>H</sub>17 and T<sub>FH</sub> differentiation<sup>12,26,29,30,40,41</sup>. To this end, it is notable that we find Aiolos enrichment at regulatory regions known to be targeted by STAT5. This includes the promoters of *Bcl6* and *Il2ra*, genes whose expression we show are inversely regulated by the activities of Aiolos and STAT5. Further work is needed to elucidate the mechanistic interplay between these

transcription factors throughout the genomes of the cells studied here, as well as other IL-6 and IL-2 responsive immune cell populations.

It is also interesting to compare the known role of Aiolos in the differentiation of T<sub>H</sub>17 cells to that of our findings with T<sub>FH</sub> populations. In a prior study, Aiolos was found to be a direct repressor of IL-2 expression<sup>39</sup>. This ultimately aided in the differentiation of T<sub>H</sub>17 cells due to a lessening of the negative impacts of IL-2 on T<sub>H</sub>17 cell formation. Alternatively, we find here that Aiolos represses CD25 expression, thus limiting the ability of differentiating T<sub>FH</sub> cells to respond to signals from this cytokine. Our findings are consistent with those from other studies demonstrating that T<sub>FH</sub> cells function as IL-2 producers during responses to infection and that T<sub>FH</sub> cells rely on signals from IL-6/STAT3 to allow for repression of IL-2R subunits<sup>30,33,42</sup>.

Our findings are also significant as they pinpoint Aiolos as a repressor of the cytotoxic gene program in CD4<sup>+</sup> T cells. CD4-CTLs are diverse regulators of immune responses as they are known contributors during infection, anti-tumor immunity, and autoimmunity<sup>4</sup>. To date, the mechanisms that promote CD4-CTL differentiation have remained somewhat enigmatic with the apparent formation of these cells driven via multiple signaling pathways and sets of transcriptional regulators<sup>3,4</sup>. Our current finding that Aiolos drives Bcl-6 and TCF-1 expression is consistent with a prior study demonstrating that these factors can repress the acquisition of cytotoxic features by CD4<sup>+</sup> T cells<sup>15</sup>. Prior work has also demonstrated that IL-2/STAT5 signaling and increased Blimp-1 expression can help to drive cytotoxic programming in CD4<sup>+</sup> T cells<sup>13,43,44</sup>. Indeed, we find that increased IL-2 responsiveness in the absence of Aiolos plays a central role by enhancing the association of STAT5 with key cytotoxic gene regulatory elements. Importantly, we also find that increased STAT5 association correlates with enhanced chromatin accessibility at these genes. Notably, this mechanism appears to drive the expression of the genes encoding both Eomes and Blimp-1, known positive regulators of the cytotoxic program in CD4<sup>+</sup> T cells. We further find enhanced STAT5 association with genes encoding effector cytokines and molecules including IFN- $\gamma$ , granzyme B, and perforin. Interestingly, alterations to

the cytotoxic gene program appear to be largely driven by IL-2/STAT5-dependent increases in Eomes expression, rather than impacting T-bet expression. In this regard, it will be important in future studies to explore the relationship between Aiolos and both T-box factors in other immune cellular settings, such as CD8<sup>+</sup> T cell populations where the balance of these transcription factors is critical in promoting diverse effector responses, exhaustion, and memory cell programming<sup>45-48</sup>.

Finally, it should be noted that Aiolos is currently a target of the FDA approved chemotherapeutic lenalidomide for the treatment of multiple myeloma<sup>49</sup>. Further work has shown that exposure of CAR-T cells to lenalidomide can potentiate anti-tumor activity of these cells in murine cancer models, though the mechanisms are still being investigated<sup>50</sup>. Still, the effect of lenalidomide on cells across the immune system and the mechanisms involved are currently unclear. Our findings identifying Aiolos as a pivotal regulator of T<sub>FH</sub> and CD4-CTL differentiation provide needed clarity into the impact of Aiolos on immune cell populations and highlight its potential as a therapeutic target for the manipulation of CD4<sup>+</sup> T cell-dependent humoral and cytotoxic responses.

## **Materials and Methods**

### *Mouse strains*

C57BL/6 mice were obtained from the Jackson Laboratory. *Ikzf3*<sup>-/-</sup> mice were originally obtained from Riken BRC and backcrossed to the C57BL/6 Jackson background for at least 10 generations to generate *Ikzf3*<sup>-/-</sup>/J mice.

### *CD4<sup>+</sup> T cell isolation and culture*

Naive CD4<sup>+</sup> T cells were isolated from the spleens and lymph nodes of 5-7 week old mice using the BioLegend Mojosort naïve CD4<sup>+</sup> T cell isolation kit according to the manufacturer's



recommendations. Naïve cell purity was verified by flow cytometry and routinely exceeded 96-98%. For the *in vitro* polarization of T<sub>FH</sub>-like and T<sub>H1</sub> populations, cells (1.5-2x10<sup>5</sup> cells/mL) were cultured in complete IMDM ((IMDM [Life Technologies], 10% FBS [26140079, Life Technologies], 1% Penicillin-Streptomycin [Life Technologies], and 50mM 2-mercapto-ethanol [Sigma-Aldrich]) on plate-bound anti-CD3 (clone 145-2C11; 5ug/mL) and anti-CD28 (clone 37.51; 2ug/mL) in the presence of IL-4 neutralizing antibody (11B11, BioLegend, 5ug/mL) for 18-20 hours before the addition of cytokines as follows: for T<sub>FH</sub> polarization: rmlL-6 (R&D, 100ng/mL); for T<sub>H1</sub> polarization, rmlL-12 (R&D, 5ng/mL) and rhIL-2 (NIH, 50U/mL). For T<sub>H2</sub> polarization, cells were cultured on plate-bound anti-CD3 (clone 145-2C11; 5ug/mL) and anti-CD28 (clone 37.51; 2ug/mL) in the presence of IFN- $\gamma$  neutralizing antibody (XMG1.2, BioLegend, 10ug/mL) and rmlL-4 (R&D, 10ng/mL). For some experiments, IL-2 was also neutralized (JES6-1A12, BioLegend, 5ug/mL). Cells were cultured on stimulation for 72-96h before analysis.

#### *RNA isolation and qRT-PCR*

Total RNA was isolated from the indicated cell populations using the Macherey-Nagel Nucleospin RNA Isolation kit as recommended by the manufacturer. cDNA was generated from mRNA template using the Superscript IV First Strand Synthesis System with provided oligo dT primer (Thermo Fisher). qRT-PCR reactions were performed with the SYBR Select Mastermix for CFX (ThermoFisher) using 10-20ng cDNA per reaction and the primers provided below. All qRT-PCR was performed on the CFX Connect (BioRad). Data were normalized to *Rps18* and presented either relative to *Rps18* or relative to the control sample, as indicated.

| qRT-PCR Primers |                                   |                                |
|-----------------|-----------------------------------|--------------------------------|
| Gene (murine)   | FWD                               | REV                            |
| <i>Ikzf3</i>    | CCGACTGTGGAGCTGAAAAGC             | CCTGCATCTTCGCTTCATTGG          |
| <i>Bcl6</i>     | CCAACCTGAAGACCCACACTC             | GCGCAGATGGCTTTCAGAGTC          |
| <i>Tbx21</i>    | GTGACTGCCTACCAGAACGC              | AGGGGACACTCGTATCAACAG          |
| <i>Gata3</i>    | CCG CAG GCA TTG CAA AGG TA        | CCA AGG CAC GAT CCA GCA CA     |
| <i>Tcf7</i>     | TCC TGC GGA TAT AGA CAG CAC TTC C | ATA TGG CTG CAG CTC CTG CTT C  |
| <i>Zfp831</i>   | CGCCTGAGCTTCCCTATCCATCAG          | GCTCTTGCCAGAACTCCCTTC          |
| <i>Il1g</i>     | CTACCTTCTTCAGCAACAGC              | GCTCATTGAATGCTTGGCGC           |
| <i>Gzmb</i>     | TCC TCC TGC TAC TGC TGA CCT TG    | CAC ATA TCG CCT CAG GCT GCT G  |
| <i>Eomes</i>    | AGA GGA CGG TGT GGA GGA CTT G     | AAC GCC GTA CCG ACC TCC AG     |
| <i>Prf1</i>     | GCT GAG AAG ACC TAT CAG GAC CAG   | GCC TGT GGT AAG CAT GCT CTG TG |
| <i>Il2ra</i>    | CCACAACAGACATGCAGAAGCC            | GCAGGACCTCTCTGTAGAGCCTTG       |
| <i>Il2rb</i>    | GGCCATGGCTGAAGACAGTTCTC           | CGGCCTTGAATCTCCGTCGAG          |
| <i>Prdm1</i>    | CTTGTGTGGTATTGTGGGAC              | CACGCTGACTCTCTCTTGG            |

### Immunoblot analysis

Immunoblots were performed as described previously<sup>31,51</sup>. Briefly, cells were harvested and pellets were lysed and prepared via boiling for 15 mins in 1X loading dye (50 mM Tris [pH 6.8], 100 mM DTT, 2% SDS, 0.1% bromophenol blue, 10% glycerol). Lysates were separated by SDS-PAGE on 10% Bis-Tris Plus Bolt gels (ThermoFisher) and transferred onto 0.45µm nitrocellulose membrane. Membranes were blocked with 2% nonfat dry milk in 1X TBST (10 mM Tris [pH 8], 150 mM NaCl, 0.05% Tween-20), and detection of indicated proteins was carried out using the following antibodies: Aiolos (clone D1C1E, Cell Signaling, 1:20,000), Bcl-6 (clone K112, BD Biosciences, 1:500), pSTAT5<sub>(Y694/9)</sub> (clone BD Biosciences, 1:5000), STAT5 (clone D206Y, Cell Signaling, 1:5000), β-Actin (GenScript, 1:15,000), T-bet (clone 4B10 Santa Cruz, 1:500), Eomes (Abcam. 1:5,000) goat anti-mouse:HRP (Jackson Immunoresearch, 1:5,000-1:30,000), mouse anti-rabbit:HRP (Santa Cruz, 1:5000-1:20,000).

### RNA-seq Analysis

Naïve CD4<sup>+</sup> T cells were cultured under T<sub>H</sub>1 or T<sub>FH</sub>-polarizing conditions for 3-4 days. Total RNA was isolated using the Macherey-Nagel Nucleospin kit according to the manufacturer's instructions. Samples were provided to Azenta Life Sciences for polyA selection, library preparation, sequencing, and DESeq2 analysis. Genes with a p-value < 0.05 were considered significant, and those with an absolute log2 fold change of ≥1.0 were defined as differentially

expressed genes (DEGs) for each comparison in the present study. Genes pre-ranked by multiplying the sign of the fold-change by  $-\log_{10}$  (p-value) were analyzed using the Broad Institute Gene Set Enrichment Analysis (GSEA) software for comparison against 'hallmark', 'gene ontology', and 'immunological signature' gene sets. Heatmap generation and clustering (by Euclidean distance) were performed using normalized  $\log_2$  counts from DESeq2 analysis and the Morpheus software (<https://software.broadinstitute.org/morpheus>). Volcano plots were generated using  $-\log_{10}$ (p-value) and  $\log_2$  fold change values from DESeq2 analysis and VolcanoR software (<https://huygens.science.uva.nl/VolcanoR/>)<sup>52</sup>.

#### *Influenza infection and tissue preparation*

Influenza virus strain PR8 was propagated in 10-day old embryonated chicken eggs and titered on MDCK cells. Naive mice were infected intranasally with 40 PFU PR8 suspended in 50 $\mu$ L sterile PBS. After 8 days, draining lymph nodes were harvested. For serum antibody analyses, whole blood was collected by cardiac puncture for serum isolation. Single cell suspensions were generated in tissue preparation media (IMDM + 4% FBS) by passing tissue through a nylon mesh strainer, followed by erythrocyte lysis via 3-minute incubation in 0.84%  $\text{NH}_4\text{Cl}$ . Cells were washed 1X in ice cold FACS buffer (PBS + 4% FBS) before staining.

#### *Human Tissue Samples*

Human tissues were collected and utilized in accordance with protocols approved by The Ohio State University Institutional Review Board. Donor consent was acquired when deemed appropriate according to the approved Ohio State University Institutional Review Board protocol. Human pediatric tonsils were obtained following overnight shipment after surgery via the CHTN Western Division at Vanderbilt University (Nashville, TN). Lymphocytes were enriched from fresh tonsil tissue specimens using previously reported protocols<sup>53</sup>. Briefly, single-cell

suspensions were generated by dissociation via a GentleMACS Dissociator (Miltenyi Biotech) according to the manufacturer's instructions. Cells were diluted in PBS (Thermo Fisher Scientific), layered over Ficoll-Paque PLUS (GE Healthcare), and centrifuged at 2000 rpm for 20 minutes at room temperature with the brake off and the mononuclear layers were harvested.

### *Flow Cytometry*

For analysis of antigen-specific CD4<sup>+</sup> T cell populations in murine samples, cells were stained in FACS buffer with IA<sup>b</sup> NP<sub>311-325</sub> MHC class II tetramer (1:100, NIH Tetramer Core Facility) at room temperature for 1 hour. To address intra-replicate variability for the analysis of antigen-specific populations, the percentage of NP<sup>+</sup> cells in Aiolos-deficient samples was presented relative to WT. For these analyses, a single WT sample was set as the control for each independent experiment, and each sample was normalized to this control. For the analysis of extracellular markers, samples were pre-incubated for  $\geq 5$  minutes at 4C with Fc Block (clone 93; BioLegend), then stained in the presence of Fc block for 30 minutes at 4C using the following antibodies: CD4 (1:300; clone GK1.5; R&D Systems); CD44 (1:300; clone IM7; BD Biosciences); CD62L (1:300; clone MEL-14; ThermoFisher); PD-1 (1:50; clone 29F.1A12; BioLegend); Cxcr5 (1:50; clone SPRCL5; ThermoFisher); CD25 (1:25; clone PC61.5; ThermoFisher); Cx3cr1 (1:100; Clone Z8-50 (RUO); BD Biosciences), and Ghost viability dye (1:400; Tonbo Biosciences). Cells were then washed 2X with FACS buffer prior to intracellular staining. For intracellular staining, cells were fixed and permeabilized using the eBioscience Foxp3 transcription factor staining kit (ThermoFisher) for 30 minutes at room temperature, or overnight at 4C. Following fixation, samples were stained with the following antibodies in 1X eBiosciences permeabilization buffer for 30 minutes at room temperature: T-bet (1:100; clone 4B10; BioLegend); Foxp3 (1:300; clone FJK-16s; ThermoFisher); Bcl-6 (1:20; clone K112-9; BD Biosciences); Eomes (1:100; clone DAN11MAG; ThermoFisher); Granzyme B (1:100; clone

GB11 ThermoFisher); and Perforin (1:100; S16009A; BioLegend). Cells were washed with 1X eBiosciences permeabilization buffer and resuspended in FACS buffer for analysis. Samples were run on a BD FACS Canto II and analyzed using FlowJo software (version 10.8.1). For human tissue analysis, lymphocyte populations were stained using antibodies directed against surface or intracellular proteins according to the manufacturers' recommendations. Where appropriate, fluorescence minus one (FMO) controls were used to determine nonspecific staining. The LIVE/DEAD Fixable Aqua Dead Cell Stain Kit (Thermo Fisher Scientific) was used to exclude nonviable cells in the analysis. Intracellular staining was performed using the Transcription Factor/FOXP3 Fixation/Permeabilization Solution Kit (Thermo Fisher Scientific) according to the manufacturer's instructions. For surface staining, the following antibodies were used: CD44-APC (DB105, Miltenyi Biotec), CD4-AF700 (RPA-T4, Thermo Fisher Scientific), CD45RA-APC-cy7 (REA1047, Miltenyi Biotec), AIOLOS-PE (16D9C97, BioLegend), CXCR5-Pe-Vio770 (MU5UBEE, Thermo Fisher Scientific), FOXP3-PerCP-Vio770 (PCH101, Thermo Fisher Scientific), CD3-PE-Vio615 (UCHT1, BioLegend), CD8-FITC (REA734, Miltenyi Biotec), PD-1-BV421 (MIH4, BD Biosciences), CD62L-BV605 (DREG-56, BD Biosciences), CD45RO-BV650 (UCHTL1, Biolegend). Data were acquired on the FACS Aria II (BD Biosciences) and analyzed using FlowJo (BD Biosciences) software.

### *Serum antibody ELISA*

To detect anti-PR8 antibodies response, high-binding microplates (Corning) were coated with 50  $\mu$ L of UV-inactivated PR8 in PBS at 4°C overnight. To quantify the absolute antibody concentration, a standard curve for mouse isotype was established for each plate by coating 2 columns with 50  $\mu$ L goat anti-mouse Ig (1  $\mu$ g/mL in PBS; Southern Biotech) overnight at 4°C. Plates were blocked with 200  $\mu$ L 1% bovine serum albumin (Fisher Scientifics) in PBSTE (Phosphate buffered saline with 0.05% Tween-20 and 1mM EDTA) for 1 hour at 37°C. After

washing with PBSTE, 50  $\mu$ L of samples and standard Ig (Southern Biotech) were added to respective wells and incubate for 1 hour at room temperature (RT). For total IgG standard, a mixture of purified mouse IgG1, IgG2b, IgG2c, and IgG3 were combined to emulate WT antibody titers<sup>54</sup>. Biotinylated goat-anti-mouse isotype-specific (IgM, IgG) antibodies (50  $\mu$ L at 0.1  $\mu$ g/mL; Southern Biotech) were added and incubated at RT for 1 hour. Horseradish-peroxidase-conjugated streptavidin (50  $\mu$ L of 1:5000 dilution; ThermoFisher) was added and incubated at RT for 30 minutes. The plates were washed with PBSTE between steps for the procedures above. TMB High Sensitivity Substrate (BioLegend) was used for detection; reactions were stopped by adding 1 M sulfuric acid. Absorbances were measured at OD450 with OD540 as background using M2e SpectraMax 500 (Molecular Device) and antibody concentrations were calculated using the generated standard curve.

#### *ATAC-seq Analysis*

ATAC-seq analysis was performed as described<sup>55</sup>. Briefly,  $5 \times 10^4$  cells at >95% viability were processed using the Illumina Nextera DNA Library Preparation Kit, according to the manufacturer's instructions. Resultant sequences were trimmed using Bowtie 2 and trimmed reads were aligned to mouse genome mm10. Statistically significant peaks were identified using MACs2. CPM-normalized tracks were visualized using Integrative Genomics Viewer (IGV) version 2.12.2. For all presented loci, CPM ranges (0.5-2.0) are equivalent between genotypes.

#### *Chromatin Immunoprecipitation (ChIP)*

ChIP assays were performed as described previously<sup>51</sup>. Resulting chromatin fragments were immunoprecipitated with antibodies against Aiolos (Cell Signaling, clone D1C1E, 2 $\mu$ g/IP), STAT5 (R&D AF2168, 5 $\mu$ g/IP) or IgG control (Abcam ab6709; 2-5 $\mu$ g/IP, matched to experimental antibody). Enrichment of the indicated proteins was analyzed via qPCR with the

primers below. Samples were normalized to total DNA controls and isotype control antibodies were used to ensure lack of non-specific background.

| ChIP qPCR Primers                      |                           |                            |
|----------------------------------------|---------------------------|----------------------------|
| Gene (murine)                          | FWD                       | REV                        |
| <i>Tcf7</i> Ctrl.                      | GCTGGTCACTATCTTTGCCT      | GACAGCGGCTTGCTCTATACC      |
| <i>Tcf7</i> Prom.                      | CTCGCTCTCCAGCTATTCTC      | GAGCAAAGGACGCTGTTTAC       |
| <i>Bcl6</i> Ctrl.                      | GTACTCCAACAACAGCACAGC     | GTGGCTCGTTAAATCACAGAG      |
| <i>Bcl6</i> Prom.                      | CGAGTTTATGGGTAGGAGAGG     | GTCTTCGCTGTAGCAAAGCTCG     |
| <i>Zfp831</i> Ctrl.                    | GTGTTAACATGCTGGTCTCCCC    | CGATGCTCTCCTCATTGACC       |
| <i>Zfp831</i> Enhc.                    | CTGTTGATGAAAACACTCGCGC    | GGGAGGGAACACATGCTTCC       |
| <i>Il2ra</i> Ctrl. (upstream region)   | GCTCATGGCCTGCTTAACAG      | CTCTCTGTCTCTGTCTCTCTC      |
| <i>Il2ra</i> Ctrl. (downstream region) | GGAGTTCTTAGCTTCTTG        | CCAGGACACAATGAGAAGACC      |
| <i>Il2ra</i> Prom.                     | GGACTCATAAGTGAAGCCTG      | GCCTACTCTGTTCTGTGATCTC     |
| <i>Prdm1</i> Ctrl.                     | GTCACCACTCAACTTCAGACCAGAG | GCAGTATCCAGGACAACCTTCTGCTG |
| <i>Prdm1</i> Enhc.                     | GCCTCTGTACTTGTGTTTCTACACC | GGCAGGGTTCCAAGTATTCATCTG   |
| <i>Eomes</i> Prom.                     | CACGATCTGACAGTTACACTAATGC | CACTTTCATCCGATTTCTGACAC    |
| <i>Irf1</i> Prom.                      | GTGCTGTGCTCTGTGGATGAG     | CCTTTCGACTCCTTGGGCTC       |
| <i>Gzmb</i> Prom.                      | GCCTGATGACGTCTTCTGAG      | GGGACTCTGATACCATAGGCTAC    |
| <i>Prf1</i> Prom.                      | GGACAGGAAGTGGGTACCAGCTTG  | GCCGCTTCACATCTCAGCTCC      |

### Statistical analysis

All statistical analyses were performed using the GraphPad Prism software (version 9.3.1). For single comparisons, unpaired Student's t-tests were performed. For multiple comparisons, one-way ANOVA with Tukey's multiple comparison tests were performed. Error bars indicate the standard error of the mean. *P* values <0.05 were considered statistically significant.

## References:

- 1 Zhu, J. & Paul, W. E. CD4 T cells: fates, functions, and faults. *Blood* **112**, 1557-1569, doi:10.1182/blood-2008-05-078154 (2008).
- 2 Crotty, S. T follicular helper cell differentiation, function, and roles in disease. *Immunity* **41**, 529-542, doi:10.1016/j.immuni.2014.10.004 (2014).
- 3 Brown, D. M., Lampe, A. T. & Workman, A. M. The Differentiation and Protective Function of Cytolytic CD4 T Cells in Influenza Infection. *Front Immunol* **7**, 93, doi:10.3389/fimmu.2016.00093 (2016).
- 4 Takeuchi, A. & Saito, T. CD4 CTL, a Cytotoxic Subset of CD4(+) T Cells, Their Differentiation and Function. *Front Immunol* **8**, 194, doi:10.3389/fimmu.2017.00194 (2017).
- 5 Crotty, S. T Follicular Helper Cell Biology: A Decade of Discovery and Diseases. *Immunity* **50**, 1132-1148, doi:10.1016/j.immuni.2019.04.011 (2019).
- 6 Lazarevic, V. & Glimcher, L. H. T-bet in disease. *Nat Immunol* **12**, 597-606, doi:10.1038/ni.2059 (2011).
- 7 Zhu, J. & Paul, W. E. Peripheral CD4+ T-cell differentiation regulated by networks of cytokines and transcription factors. *Immunol Rev* **238**, 247-262, doi:10.1111/j.1600-065X.2010.00951.x (2010).
- 8 Kaplan, M. H., Sun, Y. L., Hoey, T. & Grusby, M. J. Impaired IL-12 responses and enhanced development of Th2 cells in Stat4-deficient mice. *Nature* **382**, 174-177, doi:10.1038/382174a0 (1996).
- 9 Thierfelder, W. E. *et al.* Requirement for Stat4 in interleukin-12-mediated responses of natural killer and T cells. *Nature* **382**, 171-174, doi:10.1038/382171a0 (1996).
- 10 Afkarian, M. *et al.* T-bet is a STAT1-induced regulator of IL-12R expression in naive CD4+ T cells. *Nat Immunol* **3**, 549-557, doi:10.1038/ni794 (2002).



- 11 Johnston, R. J. *et al.* Bcl6 and Blimp-1 are reciprocal and antagonistic regulators of T follicular helper cell differentiation. *Science* **325**, 1006-1010, doi:10.1126/science.1175870 (2009).
- 12 Oestreich, K. J., Mohn, S. E. & Weinmann, A. S. Molecular mechanisms that control the expression and activity of Bcl-6 in TH1 cells to regulate flexibility with a TFH-like gene profile. *Nat Immunol* **13**, 405-411, doi:10.1038/ni.2242 (2012).
- 13 Hua, L. *et al.* Cytokine-dependent induction of CD4+ T cells with cytotoxic potential during influenza virus infection. *J Virol* **87**, 11884-11893, doi:10.1128/JVI.01461-13 (2013).
- 14 Read, K. A., Powell, M. D. & Oestreich, K. J. T follicular helper cell programming by cytokine-mediated events. *Immunology* **149**, 253-261, doi:10.1111/imm.12648 (2016).
- 15 Donnarumma, T. *et al.* Opposing Development of Cytotoxic and Follicular Helper CD4 T Cells Controlled by the TCF-1-Bcl6 Nexus. *Cell Rep* **17**, 1571-1583, doi:10.1016/j.celrep.2016.10.013 (2016).
- 16 Nurieva, R. I. *et al.* Bcl6 mediates the development of T follicular helper cells. *Science* **325**, 1001-1005, doi:10.1126/science.1176676 (2009).
- 17 Yu, D. *et al.* The transcriptional repressor Bcl-6 directs T follicular helper cell lineage commitment. *Immunity* **31**, 457-468, doi:10.1016/j.immuni.2009.07.002 (2009).
- 18 Vinuesa, C. G., Linterman, M. A., Yu, D. & MacLennan, I. C. Follicular Helper T Cells. *Annu Rev Immunol* **34**, 335-368, doi:10.1146/annurev-immunol-041015-055605 (2016).
- 19 Choi, Y. S. *et al.* LEF-1 and TCF-1 orchestrate T(FH) differentiation by regulating differentiation circuits upstream of the transcriptional repressor Bcl6. *Nat Immunol* **16**, 980-990, doi:10.1038/ni.3226 (2015).
- 20 Ise, W. *et al.* The transcription factor BATF controls the global regulators of class-switch recombination in both B cells and T cells. *Nat Immunol* **12**, 536-543, doi:10.1038/ni.2037 (2011).

- 21 Wan, S. *et al.* Costimulation molecules differentially regulate the ERK-Zfp831 axis to shape T follicular helper cell differentiation. *Immunity* **54**, 2740-2755 e2746, doi:10.1016/j.immuni.2021.09.018 (2021).
- 22 Wu, T. *et al.* TCF1 Is Required for the T Follicular Helper Cell Response to Viral Infection. *Cell Rep* **12**, 2099-2110, doi:10.1016/j.celrep.2015.08.049 (2015).
- 23 Xu, L. *et al.* The transcription factor TCF-1 initiates the differentiation of T(FH) cells during acute viral infection. *Nat Immunol* **16**, 991-999, doi:10.1038/ni.3229 (2015).
- 24 Xu, W. *et al.* The Transcription Factor Tox2 Drives T Follicular Helper Cell Development via Regulating Chromatin Accessibility. *Immunity* **51**, 826-839 e825, doi:10.1016/j.immuni.2019.10.006 (2019).
- 25 Shao, P. *et al.* Cutting Edge: Tcf1 Instructs T Follicular Helper Cell Differentiation by Repressing Blimp1 in Response to Acute Viral Infection. *J Immunol* **203**, 801-806, doi:10.4049/jimmunol.1900581 (2019).
- 26 Johnston, R. J., Choi, Y. S., Diamond, J. A., Yang, J. A. & Crotty, S. STAT5 is a potent negative regulator of TFH cell differentiation. *J Exp Med* **209**, 243-250, doi:10.1084/jem.20111174 (2012).
- 27 Liao, W., Lin, J. X. & Leonard, W. J. IL-2 family cytokines: new insights into the complex roles of IL-2 as a broad regulator of T helper cell differentiation. *Curr Opin Immunol* **23**, 598-604, doi:10.1016/j.coi.2011.08.003 (2011).
- 28 Liao, W., Lin, J. X., Wang, L., Li, P. & Leonard, W. J. Modulation of cytokine receptors by IL-2 broadly regulates differentiation into helper T cell lineages. *Nat Immunol* **12**, 551-559, doi:10.1038/ni.2030 (2011).
- 29 Nurieva, R. I. *et al.* STAT5 protein negatively regulates T follicular helper (Tfh) cell generation and function. *J Biol Chem* **287**, 11234-11239, doi:10.1074/jbc.M111.324046 (2012).

- 30 Papillion, A. *et al.* Inhibition of IL-2 responsiveness by IL-6 is required for the generation of GC-TFH cells. *Sci Immunol* **4**, doi:10.1126/sciimmunol.aaw7636 (2019).
- 31 Read, K. A. *et al.* Integrated STAT3 and Ikaros Zinc Finger Transcription Factor Activities Regulate Bcl-6 Expression in CD4(+) Th Cells. *J Immunol* **199**, 2377-2387, doi:10.4049/jimmunol.1700106 (2017).
- 32 Weinstein, J. S. *et al.* Global transcriptome analysis and enhancer landscape of human primary T follicular helper and T effector lymphocytes. *Blood* **124**, 3719-3729, doi:10.1182/blood-2014-06-582700 (2014).
- 33 Choi, Y. S., Eto, D., Yang, J. A., Lao, C. & Crotty, S. Cutting edge: STAT1 is required for IL-6-mediated Bcl6 induction for early follicular helper cell differentiation. *J Immunol* **190**, 3049-3053, doi:10.4049/jimmunol.1203032 (2013).
- 34 Lu, K. T. *et al.* Functional and epigenetic studies reveal multistep differentiation and plasticity of in vitro-generated and in vivo-derived follicular T helper cells. *Immunity* **35**, 622-632, doi:10.1016/j.immuni.2011.07.015 (2011).
- 35 Ballesteros-Tato, A. *et al.* Interleukin-2 inhibits germinal center formation by limiting T follicular helper cell differentiation. *Immunity* **36**, 847-856, doi:10.1016/j.immuni.2012.02.012 (2012).
- 36 Crotty, S., Johnston, R. J. & Schoenberger, S. P. Effectors and memories: Bcl-6 and Blimp-1 in T and B lymphocyte differentiation. *Nat Immunol* **11**, 114-120, doi:10.1038/ni.1837 (2010).
- 37 Curran, M. A. *et al.* Systemic 4-1BB activation induces a novel T cell phenotype driven by high expression of Eomesodermin. *J Exp Med* **210**, 743-755, doi:10.1084/jem.20121190 (2013).
- 38 Szabo, S. J. *et al.* A novel transcription factor, T-bet, directs Th1 lineage commitment. *Cell* **100**, 655-669, doi:10.1016/s0092-8674(00)80702-3 (2000).

- 39 Quintana, F. J. *et al.* Aiolos promotes TH17 differentiation by directly silencing IL2 expression. *Nat Immunol* **13**, 770-777, doi:10.1038/ni.2363 (2012).
- 40 Jones, D. M., Read, K. A. & Oestreich, K. J. Dynamic Roles for IL-2-STAT5 Signaling in Effector and Regulatory CD4(+) T Cell Populations. *J Immunol* **205**, 1721-1730, doi:10.4049/jimmunol.2000612 (2020).
- 41 Laurence, A. *et al.* Interleukin-2 signaling via STAT5 constrains T helper 17 cell generation. *Immunity* **26**, 371-381, doi:10.1016/j.immuni.2007.02.009 (2007).
- 42 DiToro, D. *et al.* Differential IL-2 expression defines developmental fates of follicular versus nonfollicular helper T cells. *Science* **361**, doi:10.1126/science.aao2933 (2018).
- 43 Marshall, N. B. *et al.* NKG2C/E Marks the Unique Cytotoxic CD4 T Cell Subset, ThCTL, Generated by Influenza Infection. *J Immunol* **198**, 1142-1155, doi:10.4049/jimmunol.1601297 (2017).
- 44 Sledzinska, A. *et al.* Regulatory T Cells Restrain Interleukin-2- and Blimp-1-Dependent Acquisition of Cytotoxic Function by CD4(+) T Cells. *Immunity* **52**, 151-166 e156, doi:10.1016/j.immuni.2019.12.007 (2020).
- 45 Chen, Y., Zander, R., Khatun, A., Schauder, D. M. & Cui, W. Transcriptional and Epigenetic Regulation of Effector and Memory CD8 T Cell Differentiation. *Front Immunol* **9**, 2826, doi:10.3389/fimmu.2018.02826 (2018).
- 46 Jameson, S. C. & Masopust, D. Understanding Subset Diversity in T Cell Memory. *Immunity* **48**, 214-226, doi:10.1016/j.immuni.2018.02.010 (2018).
- 47 Lugli, E., Galletti, G., Boi, S. K. & Youngblood, B. A. Stem, Effector, and Hybrid States of Memory CD8(+) T Cells. *Trends Immunol* **41**, 17-28, doi:10.1016/j.it.2019.11.004 (2020).
- 48 McLane, L. M., Abdel-Hakeem, M. S. & Wherry, E. J. CD8 T Cell Exhaustion During Chronic Viral Infection and Cancer. *Annu Rev Immunol* **37**, 457-495, doi:10.1146/annurev-immunol-041015-055318 (2019).

- 49 Kortum, K. M., Zhu, Y. X., Shi, C. X., Jedlowski, P. & Stewart, A. K. Cereblon binding molecules in multiple myeloma. *Blood Rev* **29**, 329-334, doi:10.1016/j.blre.2015.03.003 (2015).
- 50 Wang, Z. *et al.* Lenalidomide Enhances CAR-T Cell Activity Against Solid Tumor Cells. *Cell Transplant* **29**, 963689720920825, doi:10.1177/0963689720920825 (2020).
- 51 McDonald, P. W. *et al.* IL-7 signalling represses Bcl-6 and the TFH gene program. *Nat Commun* **7**, 10285, doi:10.1038/ncomms10285 (2016).
- 52 Goedhart, J. & Luijsterburg, M. S. VolcanoR is a web app for creating, exploring, labeling and sharing volcano plots. *Sci Rep* **10**, 20560, doi:10.1038/s41598-020-76603-3 (2020).
- 53 Scoville, S. D. *et al.* Rapid Column-Free Enrichment of Mononuclear Cells from Solid Tissues. *Sci Rep* **5**, 12490, doi:10.1038/srep12490 (2015).
- 54 Klein-Schneegans, A. S., Kuntz, L., Fonteneau, P. & Loor, F. Serum concentrations of IgM, IgG1, IgG2b, IgG3 and IgA in C57BL/6 mice and their congenics at the *Ipr* (lymphoproliferation) locus. *J Autoimmun* **2**, 869-875, doi:10.1016/0896-8411(89)90013-9 (1989).
- 55 Collins, P. L. *et al.* Gene Regulatory Programs Conferring Phenotypic Identities to Human NK Cells. *Cell* **176**, 348-360 e312, doi:10.1016/j.cell.2018.11.045 (2019).

**Acknowledgments:** The authors would like to thank all members of the Oestreich Lab, as well as colleagues in the Department of Microbial Infection and Immunity for constructive criticism. The authors would also like to thank the Cooperative Human Tissue Network of the Nationwide Children's Hospital (Columbus, OH) for providing human pediatric tonsil samples. The authors would like to thank members of the Lio laboratory (Heng-Yi Chen and Fang-Yun Lay) for their technical advice. Finally, the authors would like to thank members of the Yount laboratory (Ashley Zani, Adam Kenney, and Lizhi Zhang) for assistance with influenza virus preparation.

**Funding:** This work was supported by grants from The National Institutes of Health AI134972 and AI127800 to K.J.O, AI156411 to P.L.C., CA199447 and CA208353 to A.G.F, K22CA241290 to C.J.L, F32AI161857 to M.D.P, and R01AI113021 to J.M.B. K.A.R. is supported by funding through The Ohio State University College of Medicine Advancing Research in Infection and Immunity Fellowship Program. Finally, K.J.O. was also supported by funds from The Ohio State University College of Medicine and The Ohio State University Comprehensive Cancer Center.

**Author contributions:** D.M.J. and K.A.R. assisted with the design of the study, performed experiments, analyzed data, and wrote the manuscript. S.P., J.A.T., E.D.S.H., A.V., C.D.E., R.T.W., and A.G.F. performed experiments and analyzed data. P.L.C., M.D.P., and J.M.B. assisted with analysis of -omics data. A.S., O.A., E.A.H, J.S.Y., H.E.G., and C.J.L. assisted with the influenza infection experiments and analyzed data. K.J.O. supervised the research, designed the study, analyzed data, and wrote the manuscript.

**Competing interests:** The authors declare no competing interests.

**Figure 1**

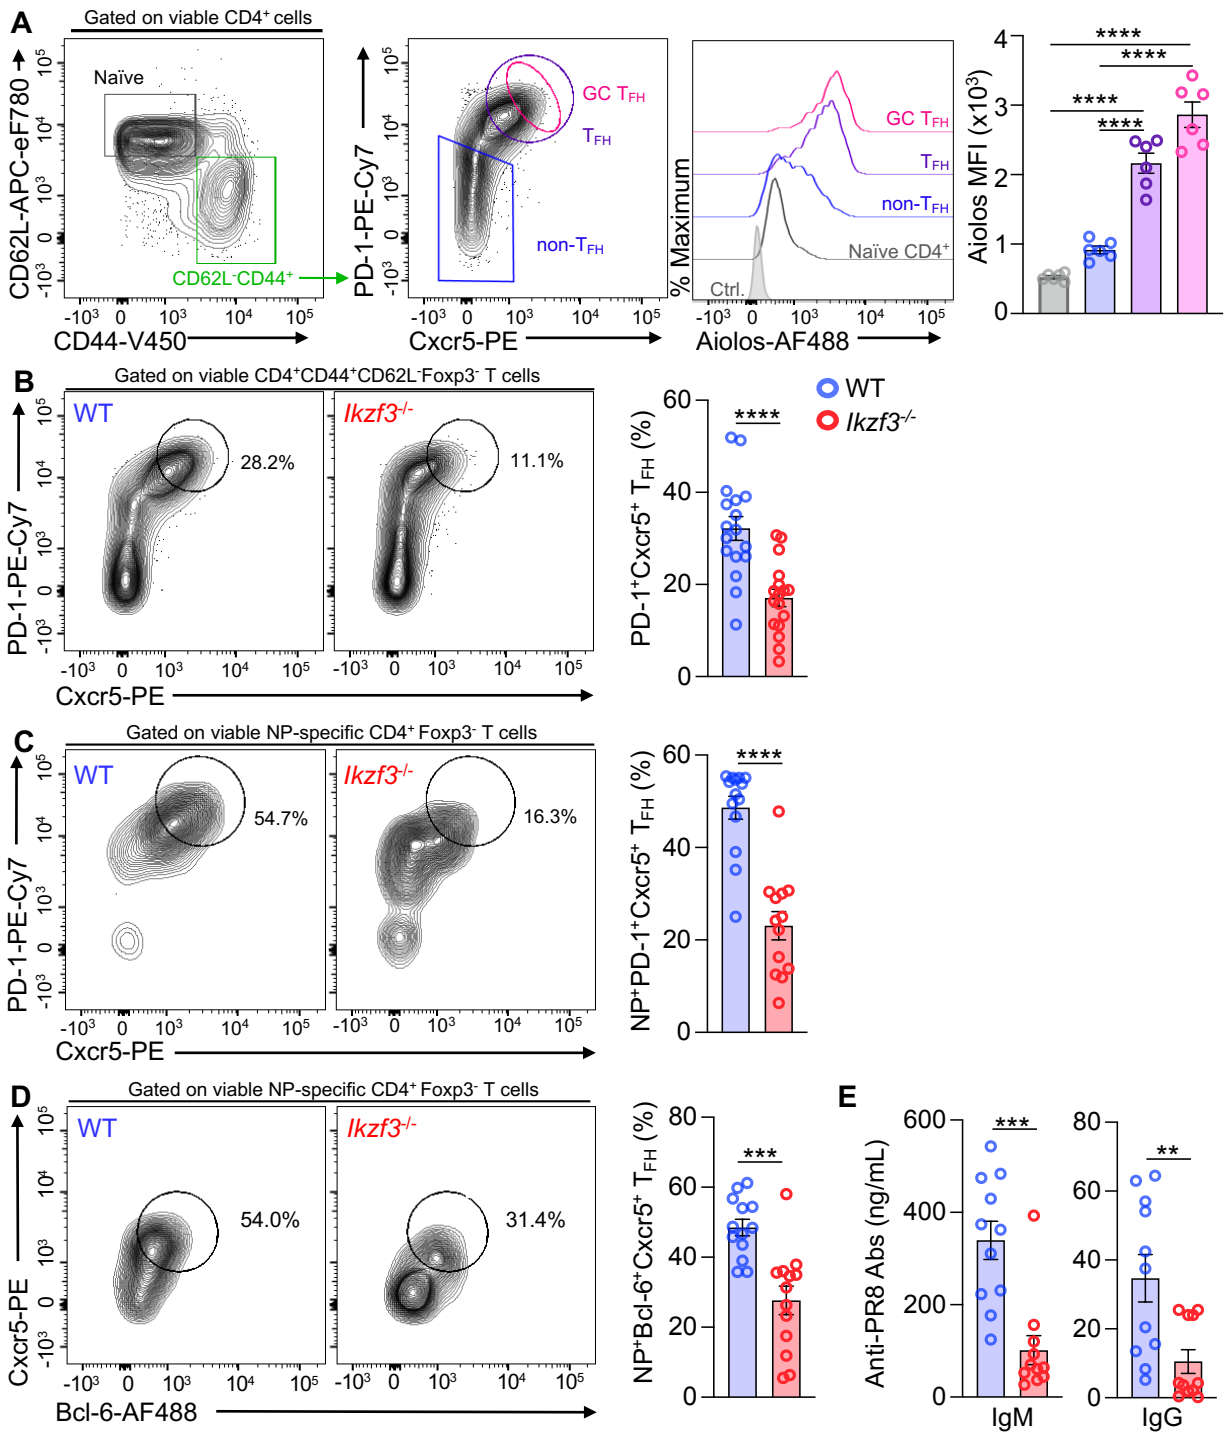

**Figure 1. Aiolos deficiency results in disrupted T<sub>FH</sub> cell differentiation and antibody production in response to influenza infection.** (A) Naïve WT C57BL/6 mice were infected intranasally with 40 PFU influenza (A/PR8/34; “PR8”) for 8 days. Single-cell suspensions were generated from the draining (mediastinal) lymph node, and analysis of Aiolos protein expression in the indicated populations was performed via flow cytometry. Data are compiled from 2 independent experiments (n = 6 ± s.e.m; \*\*\*\*P < 0.0001; unpaired Student’s t-test). (B) Analysis of the percentage of bulk PD-1<sup>HI</sup>Cxcr5<sup>HI</sup> (T<sub>FH</sub>) populations generated during influenza infection in WT versus *Ikzf3*<sup>-/-</sup> mice. Data are compiled from 5 independent experiments (n = 17 ± s.e.m; \*\*\*P < 0.001; unpaired Student’s t-test). (C) Analysis of the percentage of influenza nucleoprotein (NP)-specific PD-1<sup>HI</sup>Cxcr5<sup>HI</sup> (T<sub>FH</sub>) populations generated in response to influenza infection. Following single-cell suspension, cells were stained with fluorochrome-labeled tetramers to identify NP-specific populations (n = 13-14 ± s.e.m; data are compiled from 4 independent experiments; \*\*\*\*P < 0.0001; unpaired Student’s t-test). (D) Analysis of the percentage of influenza nucleoprotein (NP)-specific Bcl-6<sup>HI</sup>Cxcr5<sup>HI</sup> (T<sub>FH</sub>) populations generated in response to influenza infection (n = 13 ± s.e.m; data are compiled from 4 independent experiments; \*\*\*P < 0.001; unpaired Student’s t-test). (E) ELISA analysis of indicated serum antibody levels in ng/mL at 8 d.p.i. Data are compiled from 3 independent experiments (n = 11 ± s.e.m, \*\*P < 0.01, \*\*\*P < 0.001; unpaired Student’s t-test).



**Figure 2**

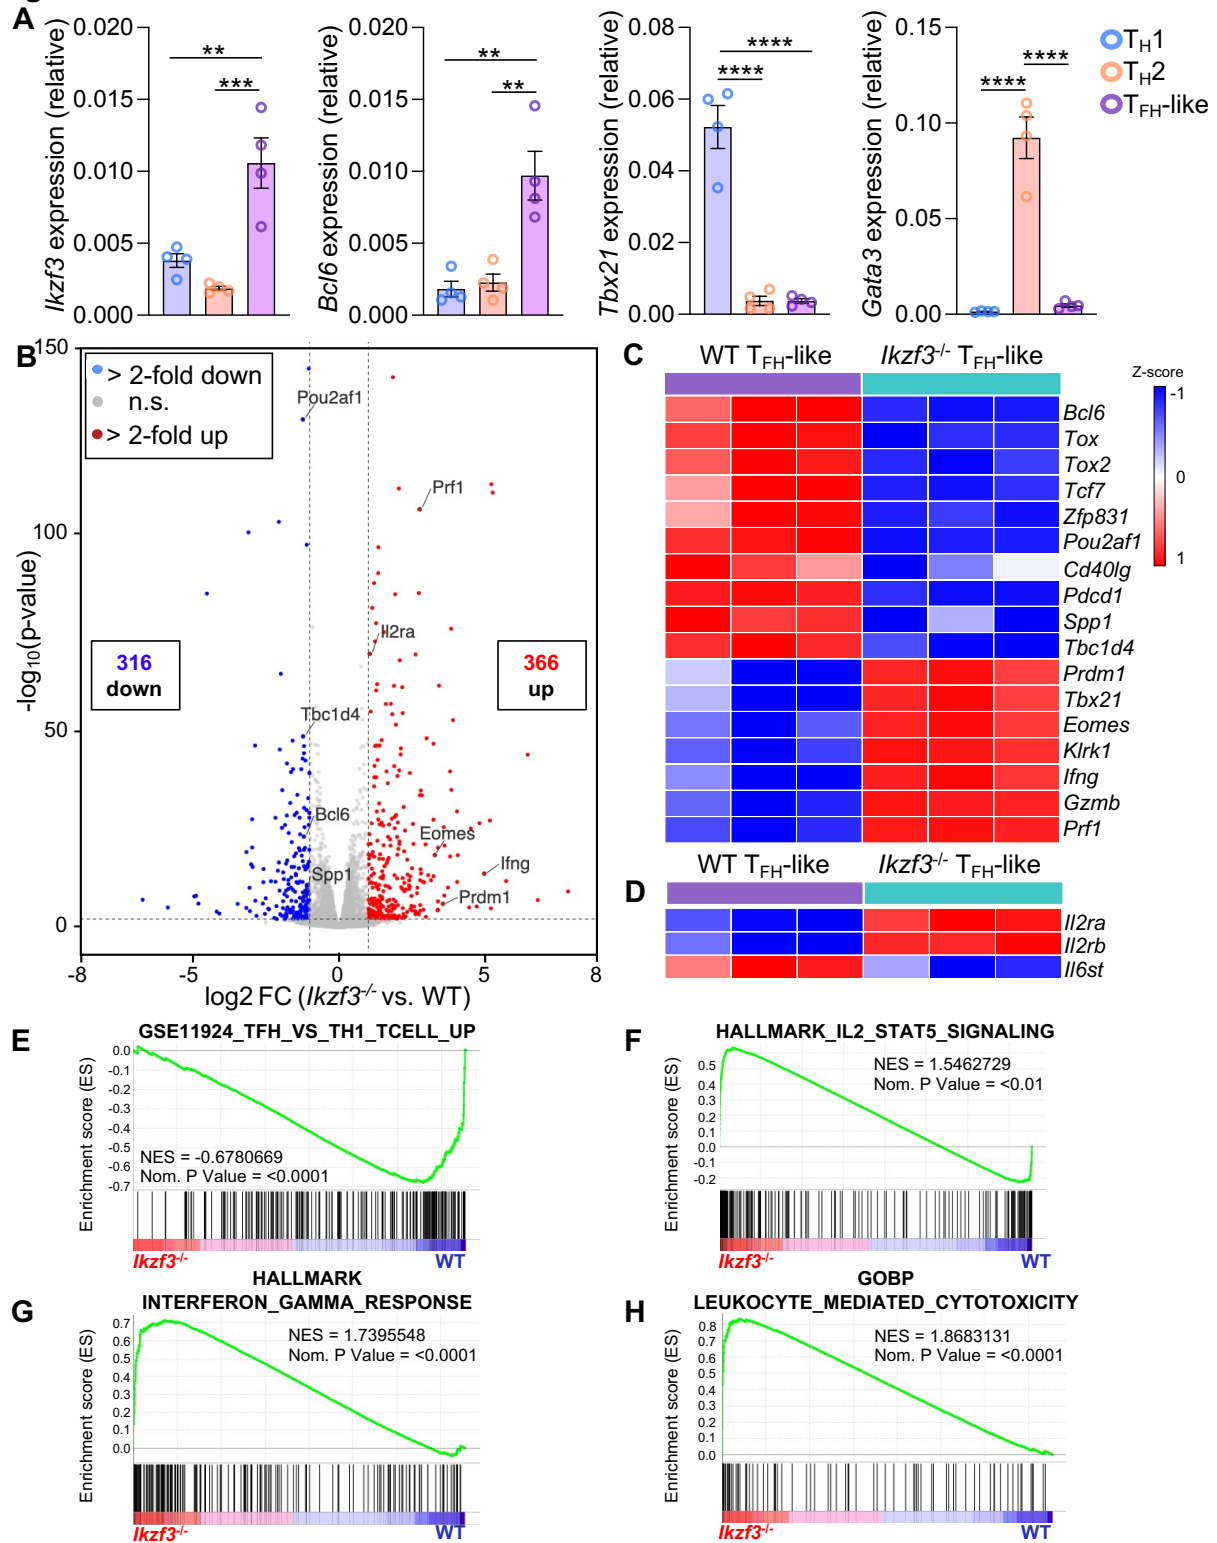

**Figure 2. Loss of Aiolos results in alterations in the T<sub>FH</sub> transcriptome. (A)** Analysis of Aiolos transcript expression across T helper cell populations. Naïve murine CD4<sup>+</sup> T cells were cultured under T<sub>H</sub>1, T<sub>H</sub>2, or T<sub>FH</sub>-polarizing conditions for 3 days. RNA was isolated and transcript analysis for the indicated genes was performed via qRT-PCR. Data are normalized and presented relative to the *Rps18* control. (n = 4 ± s.e.m; \*\*P < 0.01, \*\*\*P < 0.001, \*\*\*\*P < 0.0001; one-way ANOVA with Tukey's multiple comparisons). **(B-H)** Naïve WT or Aiolos-deficient (*Ikzf3*<sup>-/-</sup>) CD4<sup>+</sup> T cells were cultured under T<sub>FH</sub>-polarizing conditions for 3 days. RNA-seq analysis was performed to assess differentially expressed genes (DEGs) between WT and Aiolos-deficient cells. **(B)** Volcano plot displaying gene expression changes in Aiolos-deficient vs WT cells; genes of particular interest are labeled. Genes were color-coded as follows: no significant changes in expression (gray), upregulated genes with >2-fold change in expression with a P < 0.05 (red), downregulated genes with >2-fold change in expression with a P < 0.05 (blue) **(C)** Heat-map of DEGs positively and negatively associated with the T<sub>FH</sub> gene program in WT vs. Aiolos-deficient cells; changes in gene expression are presented as relative expression by row (gene). **(E-H)** Pre-ranked (sign of fold change x -log<sub>10</sub>(p-value)) genes were analyzed using the Broad Institute Gene Set Enrichment Analysis (GSEA) software for comparison against 'hallmark', 'gene ontology', and 'immunological signature' gene sets. Enrichment plots for indicated gene sets are shown. Data are compiled from 3 biological replicates from 3 independent experiments.

**Figure 3**

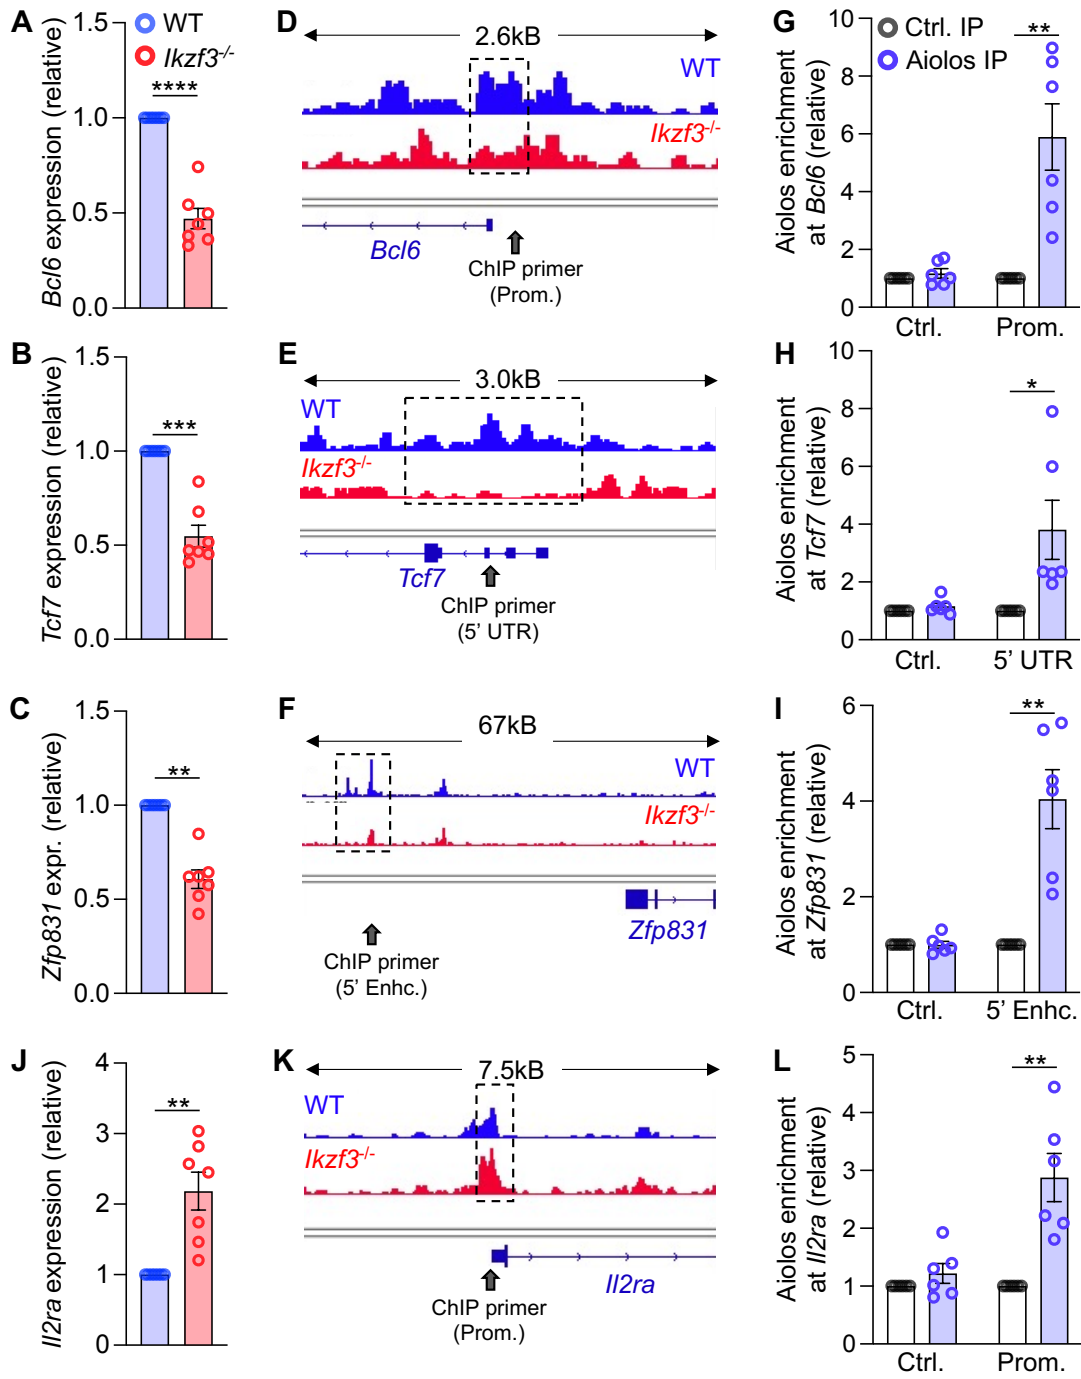

**Figure 3. Aiolos is enriched at key T<sub>FH</sub> transcription factor gene loci. (A-C, J)** Naïve CD4<sup>+</sup> T cells were cultured under T<sub>FH</sub>-like polarizing conditions. After 3 days, transcript analysis for the indicated genes was performed via qRT-PCR. (n=7 ± s.e.m; \*\**P* < 0.01, \*\*\*<0.001, \*\*\*\*< 0.0001; unpaired Student's t-test). **(D-F, K)** Assay for Transposase-Accessible Chromatin (ATAC)-seq was performed on WT and Aiolos-deficient CD4<sup>+</sup> cells cultured under T<sub>H</sub>1-skewing conditions to assess changes in accessibility at differentially expressed gene loci. CPM-normalized representative images from two independent experiments are shown. Scales are identical between WT and Aiolos-deficient tracks for each locus analyzed (range = 0.5-2.0 CPM). Approximate locations of primers used for chromatin immunoprecipitation (ChIP) are indicated with gray arrows. **(G-I, L)** ChIP analysis of Aiolos enrichment at the indicated regulatory regions, or negative control regions, are shown. Data were normalized to total IgG and presented relative to enrichment in the IgG IP control sample. (n=6 ± s.e.m; \**P* < 0.05, \*\**P* < 0.01; unpaired Student's t-test).

**Figure 4**

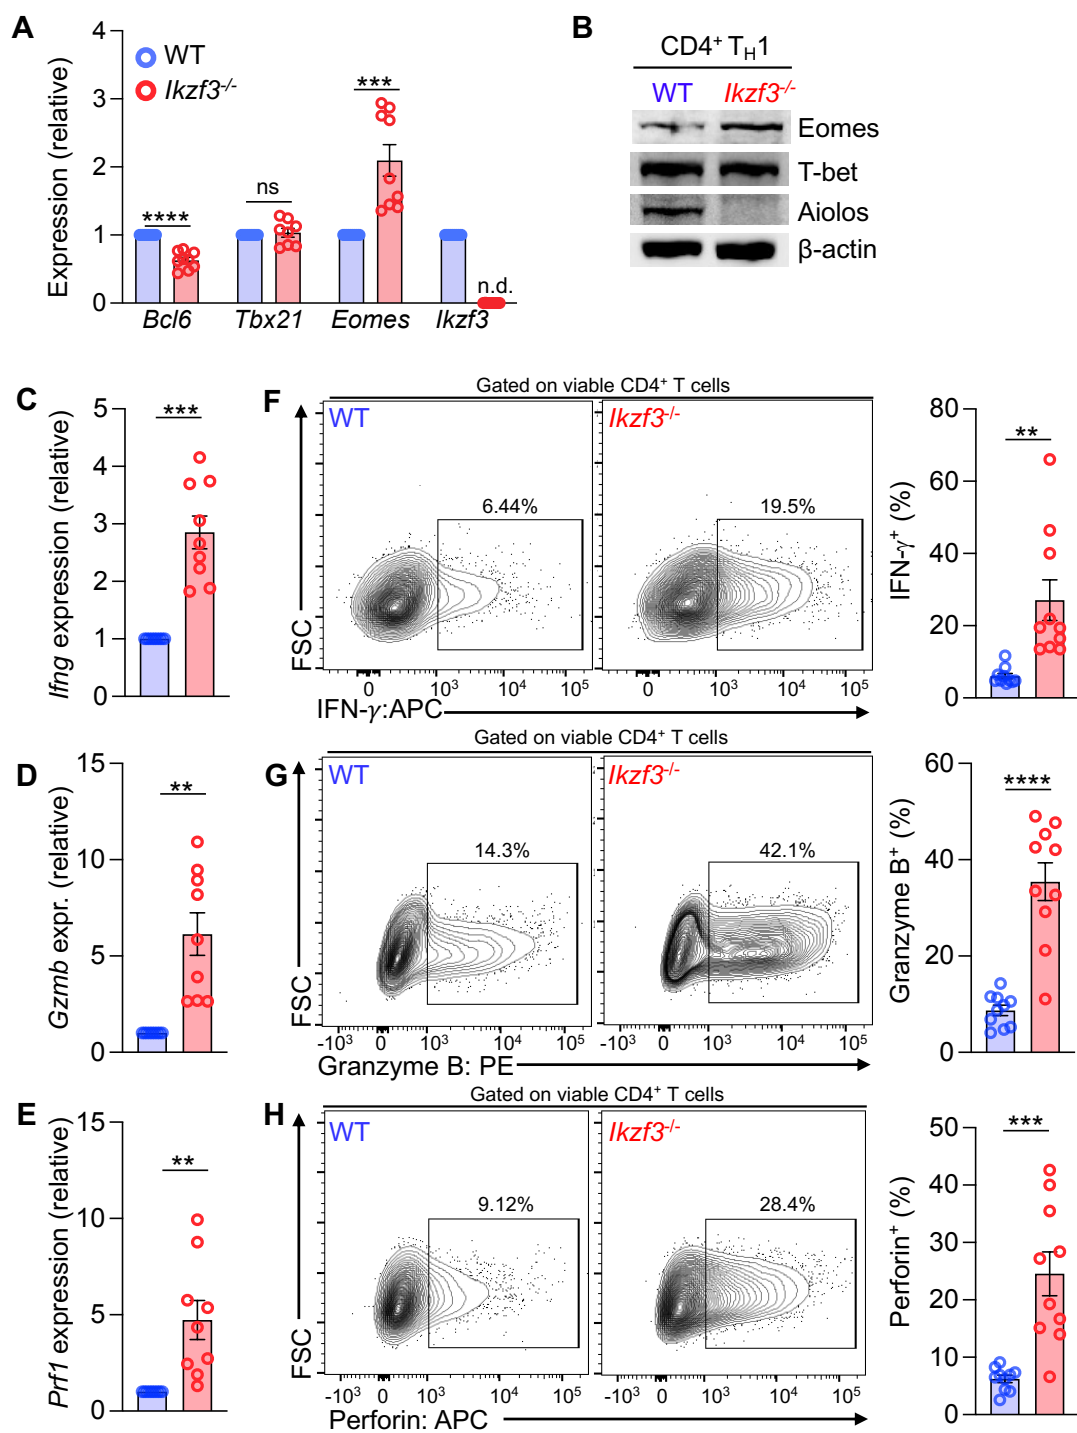

**Figure 4. Expression of the CD4-CTL gene program and effector molecule production are increased in the absence of Aiolos.** Naive WT or Aiolos-deficient (*Ikzf3<sup>-/-</sup>*) CD4<sup>+</sup> T cells were cultured under T<sub>H</sub>1-polarizing conditions for 3 days. **(A, C-E)** Transcript analysis for the indicated genes was performed via qRT-PCR. Data are normalized to *Rps18* control and presented relative to the WT sample for each gene. (n=9 ± s.e.m; \*\*P < 0.01, \*\*\*P < 0.001, \*\*\*\*P < 0.0001; unpaired Student's t-test; n.d., not detected). **(B)** Immunoblot analysis of the indicated proteins. β-actin serves as a control to ensure equivalent protein loading. A representative image from 3 independent experiments is shown. **(F-H)** Analysis of cytotoxic effector molecule production by flow cytometry. Cells were stimulated for 3h with PMA and Ionomycin in the presence of protein transport inhibitors. Cells were fixed and permeabilized and stained for the indicated proteins. (n=10 ± s.e.m; \*\*P < 0.01, \*\*\*P < 0.001, \*\*\*\*P < 0.0001; unpaired Student's t-test).

**Figure 5**

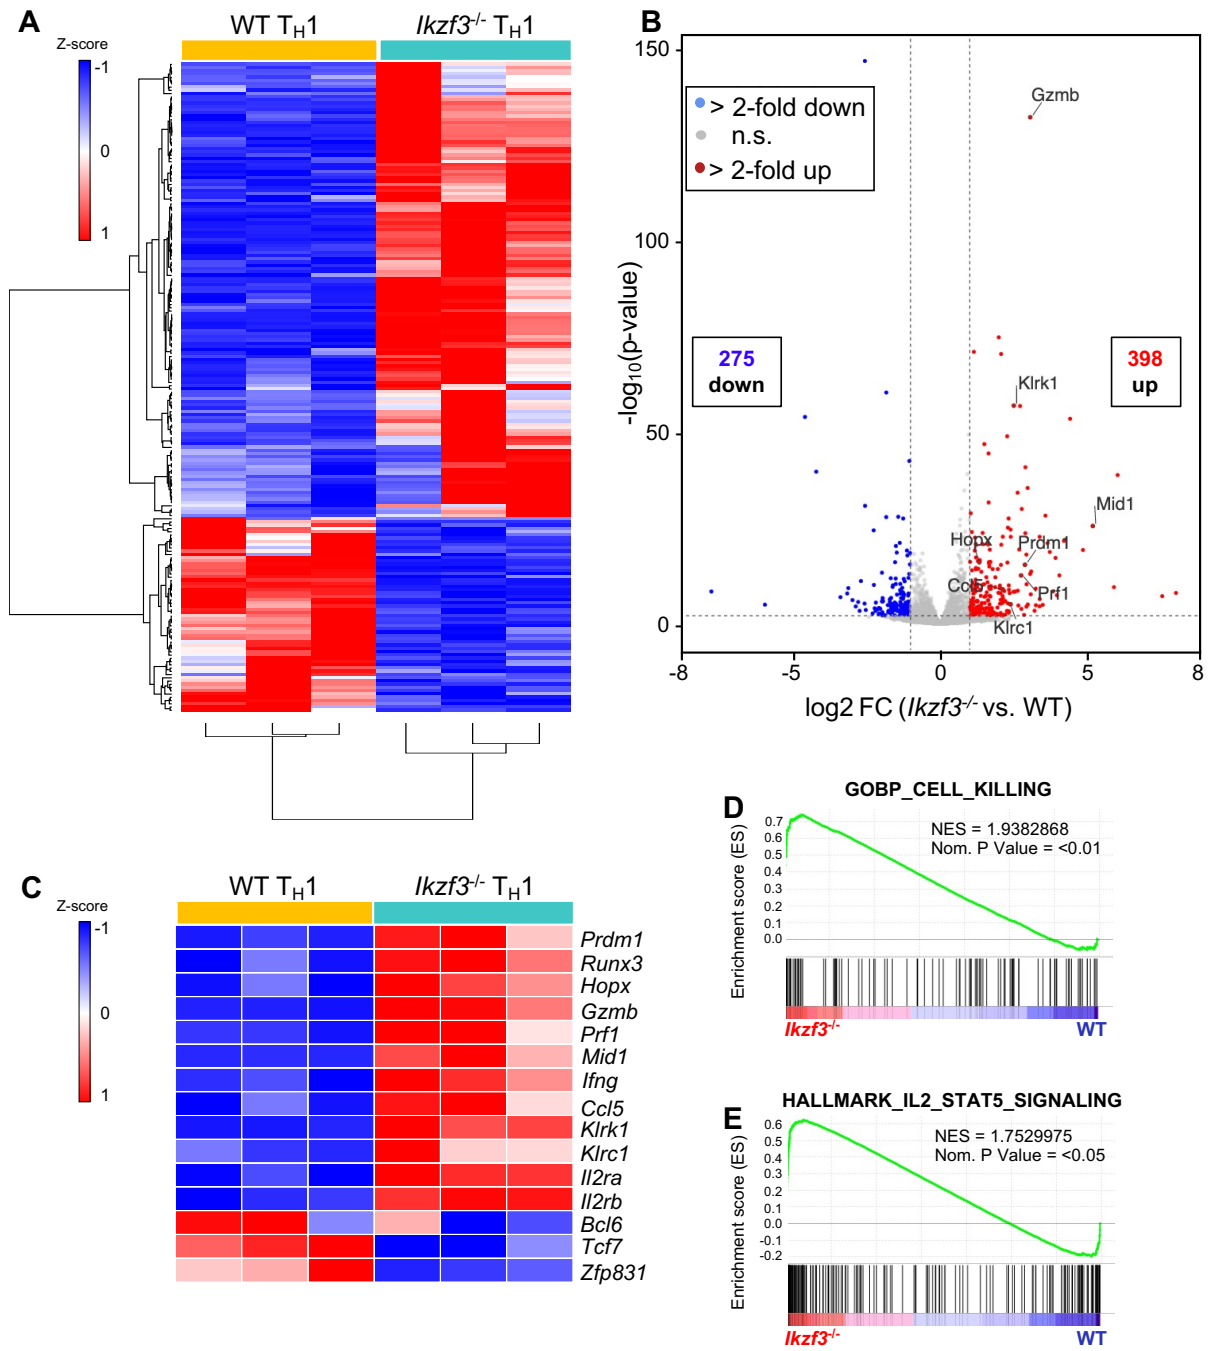

**Figure 5. Aiolos deficiency results in alterations in CD4<sup>+</sup> cytotoxic programming *in vitro*.**

Naïve WT or Aiolos-deficient (*Ikzf3*<sup>-/-</sup>) CD4<sup>+</sup> T cells were cultured under T<sub>H</sub>1-polarizing conditions for 3 days. RNA-seq analysis was performed to assess differentially expressed genes (DEGs) between WT and Aiolos-deficient cells. **(A)** Heatmap of the top 200 most differentially expressed genes ( $p < 0.05$ ). Genes and samples were clustered using Euclidean distance. Samples are compiled from 3 biological replicates from 3 independent experiments. **(B)** Volcano plot displaying gene expression changes in Aiolos-deficient vs WT cells; genes of particular interest are labeled. Genes were color-coded as follows: no significant changes in expression (gray), upregulated genes with >2-fold change in expression with a  $P < 0.05$  (red), downregulated genes with >2-fold change in expression with a  $P < 0.05$  (blue). **(C)** Heatmap of DEGs positively and negatively associated with the T<sub>H</sub>1 gene program in WT vs. Aiolos-deficient cells; changes in gene expression are presented as relative expression by row (gene). **(D-E)** Pre-ranked genes were analyzed using the Broad Institute Gene Set Enrichment Analysis (GSEA) software for comparison against 'hallmark' and 'gene ontology' gene sets. Enrichment plots for indicated gene sets are shown. Data are compiled from 3 biological replicates from 3 independent experiments.



**Figure 6**

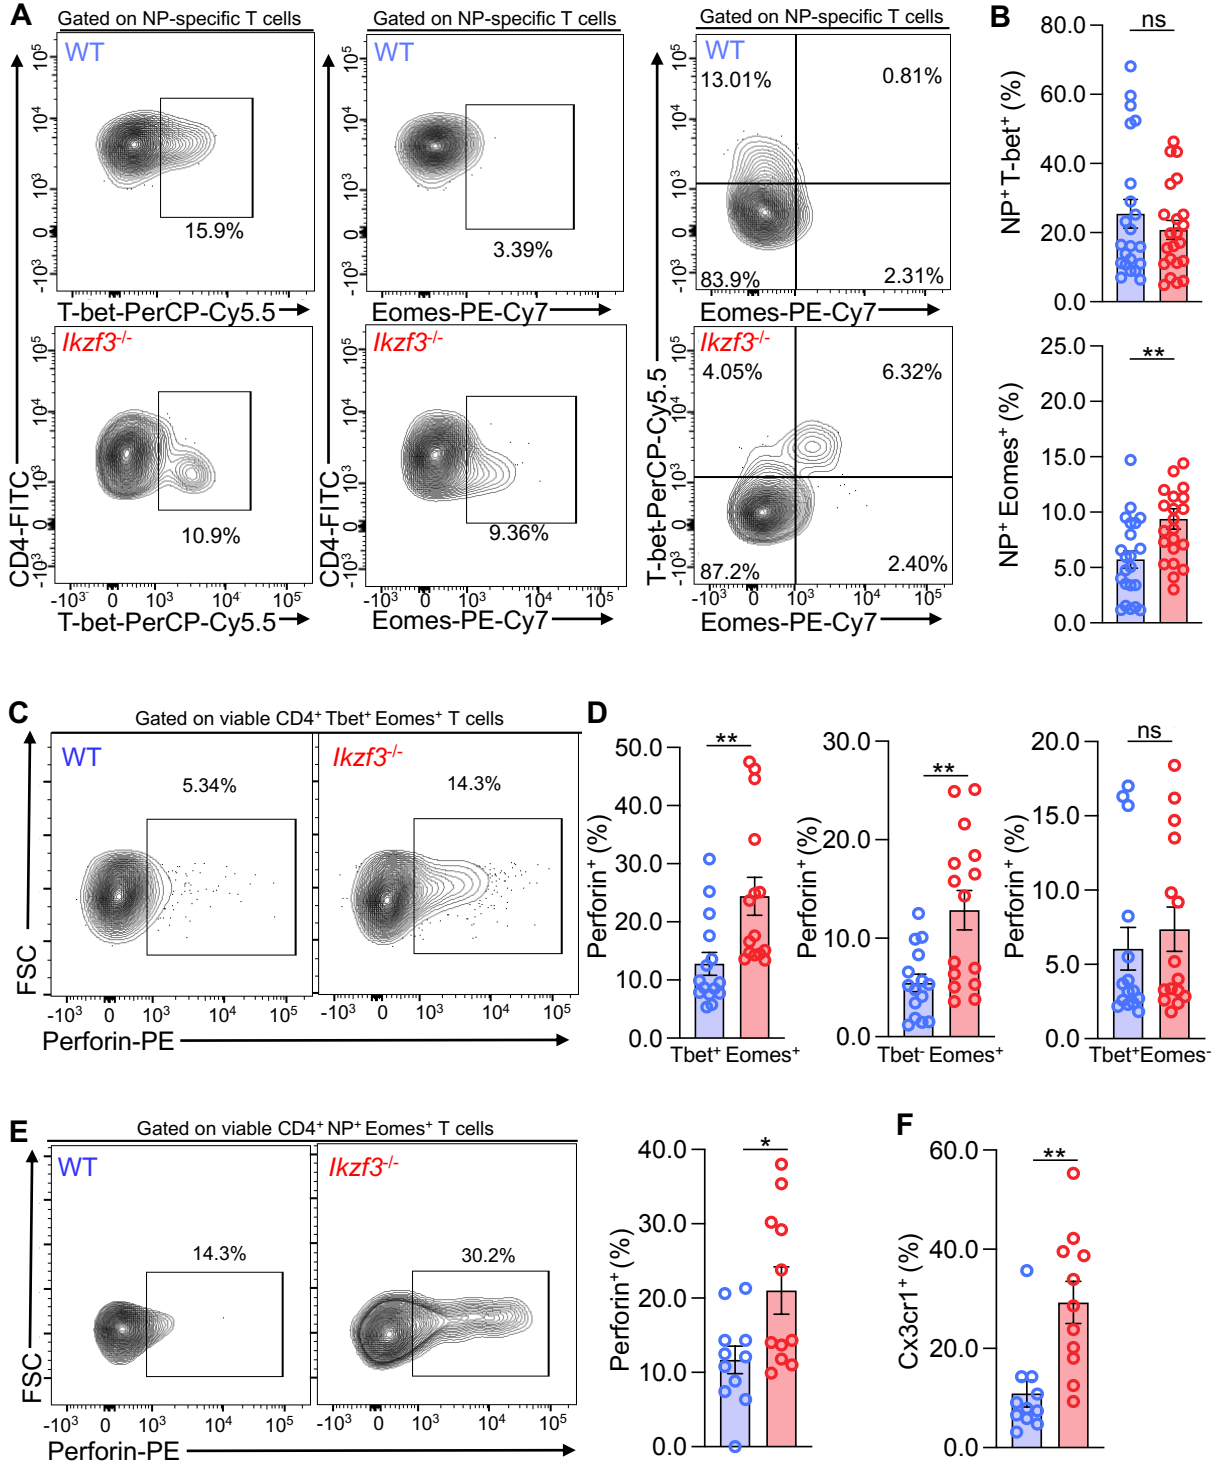

**Figure 6: Aiolos deficiency results in acquisition of cytotoxic features by CD4<sup>+</sup> T cells *in vivo*.** Naïve WT or Aiolos-deficient (*Ikzf3*<sup>-/-</sup>) mice were infected intranasally with 40 PFU influenza (A/PR8/34; “PR8”). After 8 days, draining (mediastinal) lymph nodes were harvested and viable CD4<sup>+</sup> effector populations were analyzed via flow cytometry. **(A-B)** Analysis of influenza nucleoprotein (NP)-specific cells for expression of T-bet and Eomes. Data are compiled from 7 independent experiments (n=22 ± s.e.m; \*\*P < 0.01; unpaired Student’s t-test). **(C-E)** Single-cell suspensions from the DLN were incubated in culture medium in the presence of protein transport inhibitors for 2-3 hours. Perforin production by T-bet<sup>+</sup>Eomes<sup>+</sup> and Eomes<sup>+</sup> populations was analyzed via flow cytometry. Data are compiled from 4 independent experiments. (n = 14 ± s.e.m; \*P < 0.05, \*\*P < 0.01; unpaired Student’s t-test). **(F)** Analysis of Cx3cr1 surface expression on NP<sup>+</sup>Eomes<sup>+</sup> cells. Data are compiled from 4 independent experiments (n = 14 ± s.e.m; \*\*P < 0.01; unpaired Student’s t-test).

**Figure 7**

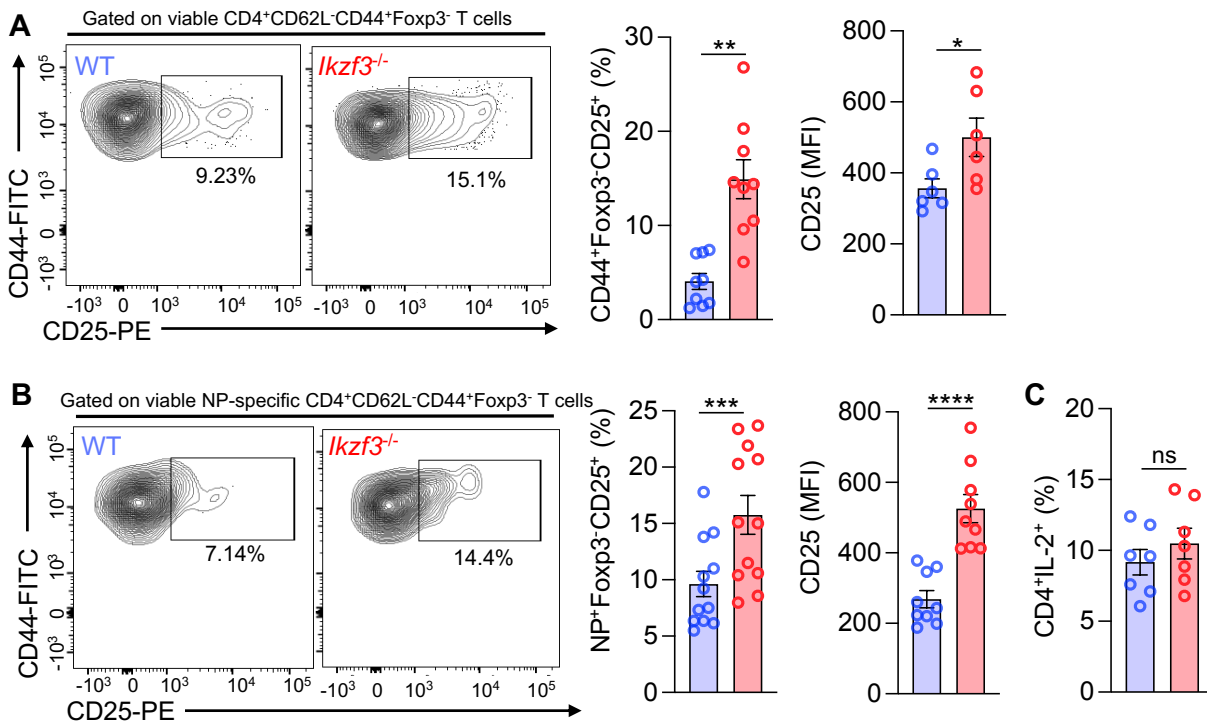

**Figure 7. Loss of Aiolos results in elevated expression of CD25.** Naïve WT or Aiolos-deficient (*Ikzf3*<sup>-/-</sup>) mice were infected with influenza (PR8) for 8 days. **(A-B)** CD25 (IL-2R $\alpha$ ) surface expression was evaluated on viable CD4<sup>+</sup>CD44<sup>+</sup>CD62L<sup>-</sup>Foxp3<sup>-</sup> (effector) T cells from the DLN via flow cytometry. Percentage of CD25<sup>+</sup> cells and median fluorescence intensity (MFI) are shown for bulk (A) and antigen-specific (B) cell populations. Data are compiled from 3 independent experiments. (n = 9  $\pm$  s.e.m; \*P < 0.05, \*\*P < 0.01, \*\*\*P < 0.001, \*\*\*\*P < 0.0001; unpaired Student's t-test). **(C)** Production of IL-2 by CD4<sup>+</sup> T cell populations was analyzed in WT vs. Aiolos-deficient mice by flow cytometry. Data are compiled from 2 independent experiments. (n = 7  $\pm$  s.e.m; unpaired Student's t-test).

**Figure 8**

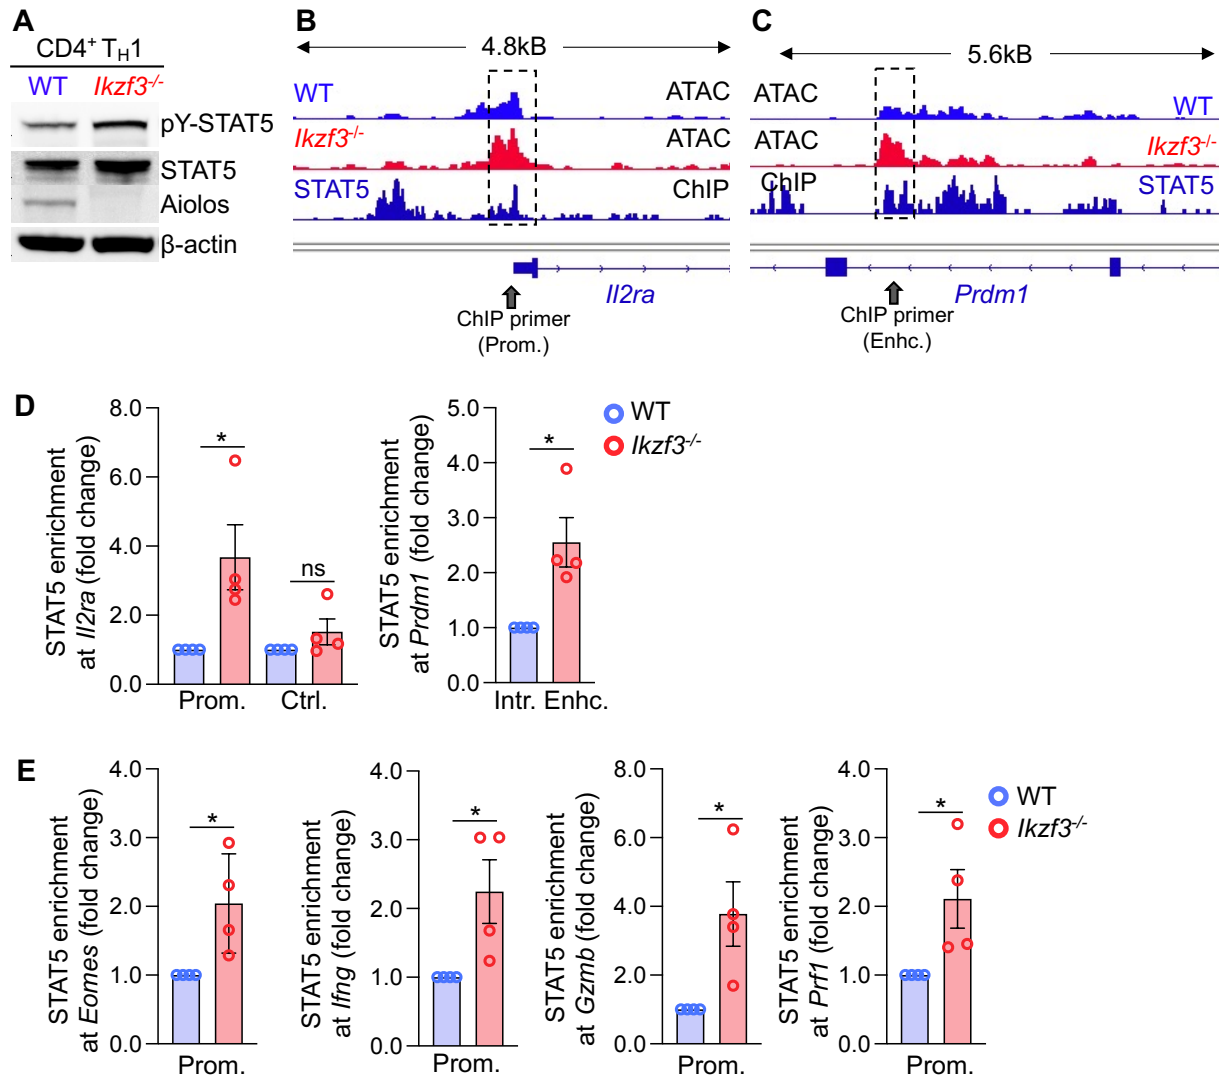

**Figure 8. Aiolos deficiency results in alterations in chromatin accessibility and STAT5 binding at regulatory regions of CD4-CTL target genes.** Naïve WT and Aiolos-deficient CD4<sup>+</sup> T cells were cultured in the presence of T<sub>H</sub>1 polarizing conditions for 3 days. **(A)** Immunoblot analysis of the indicated proteins.  $\beta$ -actin serves as a loading control. A representative image from 3 independent experiments is shown. **(B-C)** ATAC-seq analyses of T<sub>H</sub>1 samples overlaid with published STAT5 ChIP-seq data. WT (light blue, top track) and Aiolos-deficient (red, middle track) samples are displayed as CPM-normalized Integrative Genomics Viewer (IGV) tracks (representative from 2 independent experiments). STAT5 ChIP-seq data alignment (dark blue) is shown in the bottom track (from GEO # GSE102317 (GSM2734684)). Regulatory regions of note are indicated by dashed boxes. Approximate locations of primers used to assess STAT5 enrichment by ChIP are indicated with gray arrows. **(D-E)** Naïve WT and Aiolos deficient CD4<sup>+</sup> T cells were cultured in the presence of T<sub>H</sub>1 polarizing conditions for 4 days. ChIP analysis was performed for STAT5 and an IgG control at the indicated regions. Data are normalized to total input sample. IgG values were subtracted from percent enrichment and data are displayed relative to the WT sample. ( $n = 4 \pm$  s.e.m;  $*P < 0.05$ ; unpaired Student's t-test).
